# Changes of urinary proteome in high-fat diet *ApoE*<sup>-/-</sup> mice

Hua Yuanrui, Meng Wenshu, Wei Jing, Liu Yongtao & Gao Youhe\*

College of Life Sciences, Beijing Normal University, GeneEngineering Drug and  
Biotechnology Beijing Key Laboratory, Beijing, China

## Abstract

Cardiovascular disease is currently the leading cause of death worldwide. Atherosclerosis is an important pathological basis of cardiovascular disease, and its early diagnosis is of great significance. Urine is more conducive in the accumulation and response of changes in the physiological state of the body and is not regulated by homeostasis mechanisms, so it is a good source of biomarkers in the early stage of disease. In this study, *ApoE*<sup>-/-</sup> mice were fed with a high-fat diet for 5 months. Urine samples from the experimental group and control group, which were C57BL/6 mice fed a normal diet, were collected at seven time points. Proteomic analysis was used for internal control and intergroup control. Internal control results showed a significant difference in the urinary proteome before and after a 1-week high-fat diet, and several differential proteins have been reported to be associated with atherosclerosis or for use as candidate biomarkers. The results of the intergroup control indicated that the biological process enriched by the GO analysis of the differential proteins corresponded to the progression of atherosclerosis. Differences in chemical modifications of urinary proteins have also been reported to be associated with the disease. This study demonstrates that urinary proteomics has the potential to monitor changes in the body sensitively and provides the possibility of identifying early biomarkers of atherosclerosis.

**Key Words:** *ApoE*<sup>-/-</sup> mice; High-fat diet; Urinary proteome; Chemical modifications; Early biomarker

## 1 Introduction

Atherosclerosis (AS) is the primary pathological basis of cardiovascular disease (CVD)<sup>[1]</sup>, which is the leading cause of death in the world today<sup>[2]</sup>. In 2015, more than 17 million people died of cardiovascular disease, accounting for 31% of all deaths worldwide<sup>[3]</sup>. The impact of atherosclerosis is more significant during the late stages and induces a series of fatal consequences, such as myocardial infarction and stroke. Therefore, its early diagnosis is of vital importance.

Urine is an ideal source of early biomarkers because biomarkers are measurable changes related to biological processes regulated by homeostasis mechanisms, and urine can accumulate these early changes<sup>[4]</sup>. This conclusion has been confirmed by many related studies. For example, in a glioblastoma animal model constructed by injecting tumour cells into the brains of rats, changes in the urine proteome occurred before magnetic resonance imaging reflected the changes caused by the tumour<sup>[5]</sup>. Similarly, studies have confirmed that even if only approximately 10 cells are subcutaneously inoculated in rats, the urinary proteome can also change significantly<sup>[6]</sup>. In addition, urine is more accessible and non-invasive to obtain.

The use of animal models avoids the influence of genetic, environmental and other factors on the urinary proteome, and it is easier to judge the early stage of atherosclerosis and identify biomarkers<sup>[7]</sup>. Apolipoprotein E (*ApoE*) plays an important role in maintaining the normal levels of

41 cholesterol and triglycerides in serum by transporting lipids in the blood [8]. Mice lacking *ApoE*  
42 function develop hypercholesterolemia, increased very-low-density lipoprotein (VLDL) and  
43 decreased high-density lipoprotein (HDL), exhibiting spontaneous formation of plaques, and a high-  
44 fat diet can greatly accelerate the formation of plaques [9].

45 In this experiment, *ApoE*<sup>-/-</sup> mice were fed with a 5-month high-fat diet. At different timepoints  
46 (week 0, week 1, month 1, month 2, month 3, month 4, and month 5) of the experimental process,  
47 urine samples were collected and analysed by mass spectrometry. Internal control of the results was  
48 conducted as well as intergroup control using urine samples of normal diet C57BL/6 mice. The  
49 changes in the proteome and chemical modifications that occur during disease progression provide  
50 clues in the search for biomarkers.

## 51 **2 Materials and methods**

### 52 **2.1 Experimental animals**

53 Six 4-week-old male *ApoE*<sup>-/-</sup> mice were purchased from the Laboratory Animal Science  
54 Department of Peking University Health Science Centre and fed a high-fat diet (21% fat and 0.15%  
55 cholesterol, Beijing Keao Xieli Feed Co., Ltd.) for 5 months. The animal licence is SCXK (Beijing)  
56 2016-0010. A 12-hour normal light-dark cycle and standard temperature (22°C±1°C) and humidity  
57 (65%-70%) conditions were used. All animal protocols governing the experiments in this study were  
58 approved by the Institute of Basic Medical Sciences Animal Ethics Committee, Peking Union  
59 Medical College (Approved ID: ACUC-A02-2014-007). The study was carried out in compliance  
60 with the ARRIVE guidelines.

### 61 **2.2 Histopathology**

62 Six 6-month-old *ApoE*<sup>-/-</sup> mice in the experimental group and four 6-month-old normal diet  
63 C57BL/6 mice (purchased from Beijing Vital River Laboratory Animal Technology Co., Ltd.) were  
64 euthanized together. Whole arteries were dissected and stained with Oil Red O [10]. The aorta was  
65 fixed in 4% paraformaldehyde and dehydrated with isopropanol. After longitudinal incision, it was  
66 stained with Oil Red O dye solution (Biotopped, China) for 20 minutes and rinsed three times with  
67 isopropanol. A digital camera (Canon, Japan) was then used to obtain images of the aorta, which  
68 were analysed using ImageJ software (1.52a, NIH, USA).

### 69 **2.3 Urine collection and sample preparation**

70 To identify the short-term effects of a high-fat diet on animals, urine samples of experimental  
71 group mice in week 0 and week 1 were collected during the experiment. To monitor changes in the  
72 urinary proteome during the whole process, urine samples of the experimental group at months 1,  
73 2, 3, 4 and 5 were also collected. The urine of four C57BL/6 mice fed a normal diet (all purchased  
74 from Beijing Vital River Laboratory Animal Technology Co., Ltd.) corresponding to the age of  
75 *ApoE*<sup>-/-</sup> mice was collected as a control group (not the same batch). All mice were placed in  
76 metabolic cages individually for 12 h to collect urine without any treatment. The collected urine  
77 samples were immediately stored at -80°C. The experimental process is shown in Figure 1.

78 The urine samples were centrifuged at 12,000 g for 40 minutes to remove the supernatant,  
79 precipitated using 3 times the volume of ethanol overnight, and then centrifuged at 12,000 g for 30  
80 minutes. The protein was resuspended in lysis buffer (8 mol/L urea, 2 mol/L thiourea, 25 mmol/L

81 dithiothreitol and 50 mmol/L Tris). The protein concentration was measured using the Bradford  
82 method. Urine proteolysis was performed using the filter-aided sample preparation (FASP)  
83 method<sup>[11]</sup>. The urine protein was loaded on the filter membrane of a 10 kDa ultrafiltration tube  
84 (PALL, USA) and washed twice with UA (8 mol/L urea, 0.1 mol/L Tris-HCl, pH 8.5) and 25 mmol/L  
85  $\text{NH}_4\text{HCO}_3$  solution; 20 mmol/L dithiothreitol (DTT, Sigma, USA) was added for reduction at 37°C  
86 for 1 hour, and then 50 mmol/L iodoacetamide (IAA, Sigma, USA) was used for alkylation in the  
87 dark for 30 minutes. After washing twice with UA and  $\text{NH}_4\text{HCO}_3$  solutions, trypsin (Promega, USA)  
88 was added at a ratio of 1:50 for digestion at 37°C for 14 hours. The peptides were passed through  
89 Oasis HLB cartridges (Waters, USA) for desalting and then dried by vacuum evaporation (Thermo  
90 Fisher Scientific, Germany).

## 91 **2.4 Spin column peptide fractionation**

92 The digested samples were redissolved in 0.1% formic acid and diluted to 0.5  $\mu\text{g}/\mu\text{L}$ . Each  
93 sample was used to prepare a mixed peptide sample, and a high pH reversed-phase fractionation  
94 spin column (Thermo Fisher Scientific) was used for separation. The mixed peptide samples were  
95 added to the chromatographic column and eluted with a step gradient of 8 increasing acetonitrile  
96 concentrations (5, 7.5, 10, 12.5, 15, 17.5, 20 and 50% acetonitrile). Ten effluents were finally  
97 collected by centrifugation, dried with vacuum evaporation and resuspended in 0.1% formic acid.  
98 In this study, iRT reagent (Biognosis, Switzerland) was used to calibrate the retention time of the  
99 extracted peptide peaks, which were added to ten components and each sample at a volume ratio of  
100 10:1.

## 101 **2.5 LC-MS/MS analysis**

102 An EASY-nLC 1200 chromatography system (Thermo Fisher Scientific) and Orbitrap Fusion  
103 Lumos Tribrid mass spectrometer (Thermo Fisher Scientific) were used for mass spectrometry  
104 acquisition and analysis. The peptide sample was loaded onto the precolumn (75  $\mu\text{m}\times 2$  cm, C18, 2  
105  $\mu\text{m}$ , Thermo Fisher) at a flow rate of 400 nL/min and then separated using a reversed-phase analysis  
106 column (50  $\mu\text{m}\times 15$  cm, C18, 2  $\mu\text{m}$ , Thermo Fisher) for 120 minutes. The mobile phase with a  
107 gradient of 4%-35% (80% acetonitrile + 0.1% formic acid + 20% water) was used for elution. A full  
108 MS scan was acquired within a 350-1,500 m/z range with the resolution set to 120,000. The MS/MS  
109 scan was acquired in Orbitrap mode with a resolution of 30,000. The HCD collision energy was set  
110 to 30%. The mass spectrum data of 10 components separated by the reversed-phase column and all  
111 the samples obtained by enzymatic hydrolysis were collected in DDA mode.

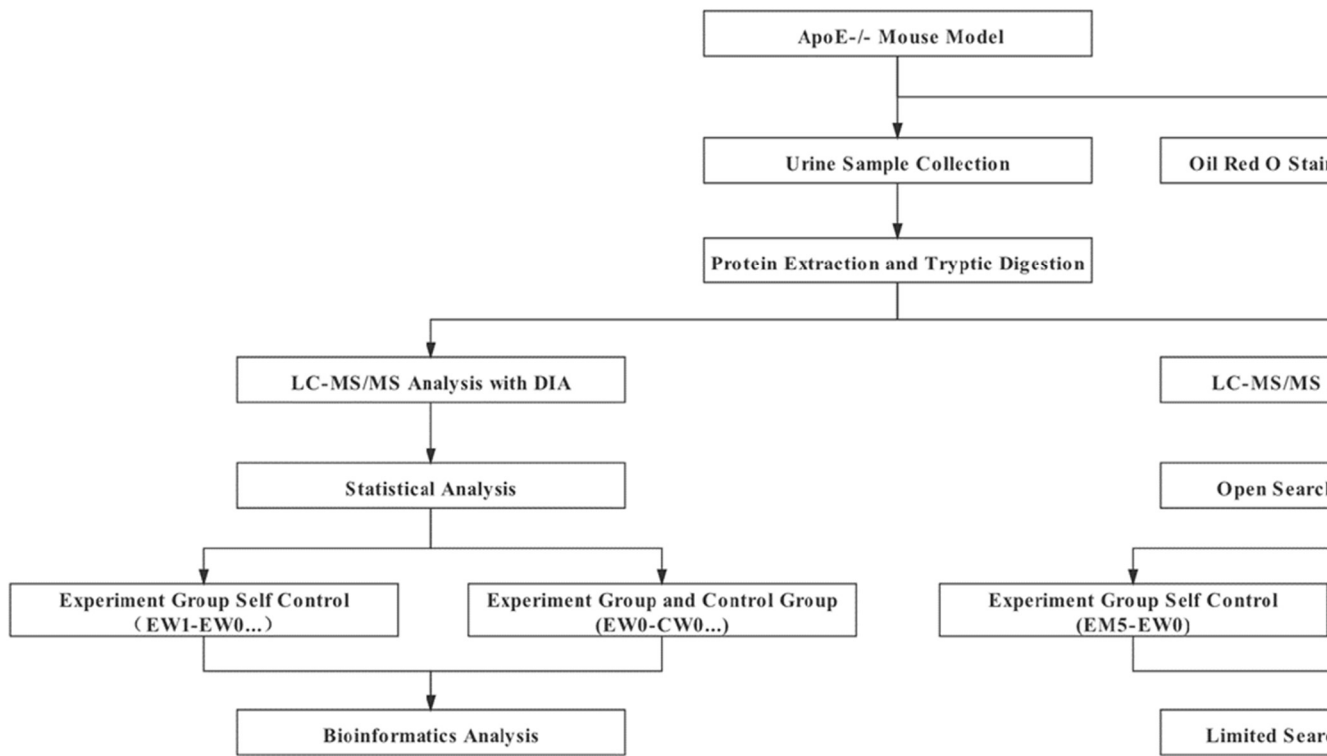

112

113

Figure 1 Experimental flow graph

114

## 115 **2.6 Label-free DIA quantification**

116 The DDA collection results of the above 10 components were imported into the Proteome  
117 Discoverer software (version 2.1, Thermo Scientific) search database using the following  
118 parameters: mouse database (released in 2019, containing 17038 sequences) with the iRT peptide  
119 sequence attached, trypsin digestion, a maximum of two missing cleavage sites are allowed, parent  
120 ion mass tolerance is 10 ppm, fragment ion mass tolerance is 0.02 Da, set methionine oxidation as  
121 variable modification, set cysteine carbamidomethylation as fixed modification, and protein false  
122 discovery rate (FDR) is set to 1%. The PD search result was used to establish the DIA acquisition  
123 method and the window width and number were calculated according to the m/z distribution density.

124 Sixty-nine peptide samples were put into DIA mode to collect mass spectrometry data.  
125 Spectronaut™ Pulsar X (Biognosys, Switzerland) software was used to process and analyse mass  
126 spectrometry data [12]. According to the DDA search result pdResult file and 10 DDA raw files,  
127 create a spectrum library, the raw files collected by DIA were imported for each sample to search  
128 the library. The high-confidence protein standard was a peptide q value<0.01, and the peak area of  
129 all fragment ions of the secondary peptide was used for protein quantification.

## 130 **2.7 Protein chemical modifications search**

131 PFind Studio software (version 3.1.6, Institute of Computing Technology, Chinese Academy  
132 of Sciences) was used to perform label-free quantitative analysis of the DDA collection results of  
133 enzymatic hydrolysis samples [13]. The target search database was from the *Mus musculus* database  
134 downloaded by UniProt (updated to September 2020). During the search process, the instrument  
135 type was set as HCD-FTMS, the enzyme was fully specific trypsin, and up to 2 missed cleaved sites  
136 were allowed. The "open-search" mode was selected, and the screening condition was that the FDR  
137 at the peptide level was less than 1%. The data used both forward and reverse database search  
138 strategies to analyse the data. After the initial screening, a restricted search method was used for  
139 verification.

## 140 **2.8 Statistical analysis**

141 The missing abundance values were determined (KNN method) [14], and CV value screening  
142 (CV<0.3) [15] was performed on the mass spectrometry results. The two-sided unpaired t-test was  
143 used for the comparison between each set of data. The internal control of the experimental group  
144 and the intergroup control at the same time points were screened for differential proteins. The  
145 screening criteria were as follows: fold change (FC) between the two groups  $\geq 1.5$  or  $\leq 0.67$  and  $p$   
146  $< 0.05$ . At the same time, the samples in each two groups were randomly combined, and the average  
147 number of differential proteins in all permutations and combinations was calculated according to  
148 the same criteria as normal screening (Table S1), ensuring that differential proteins were generated  
149 by differences between groups rather than random production.

150 The proportions of different types of chemical modification sites in the total modification sites  
151 were calculated, and the data between each two groups were compared by two-sided unpaired t-  
152 tests. The screening criteria were FC between the two groups  $\geq 1.5$  or  $\leq 0.67$  and  $p < 0.05$ .

153 The DAVID database (<https://david.ncifcrf.gov>) [16] was used to perform functional enrichment  
154 analysis on the differential proteins that were screened. The significance threshold of  $p < 0.05$  was

155 adopted. All methods were performed in accordance with the relevant guidelines and regulations.

## 156 **3 Results and Discussion**

### 157 **3.1 Histopathology**

158 The Oil Red O staining results of the whole aorta of 6-month-old *ApoE*<sup>-/-</sup> mice fed a high-fat diet  
159 for 5 months were compared to those of 6-month-old mice fed a normal diet. The average percentage  
160 of stained areas in the experimental group was 17.78±2.14% (n=6), and the average percentage in  
161 the control group was 0.88±0.34% (n=4), *p*=0.0004 (Figure 2).

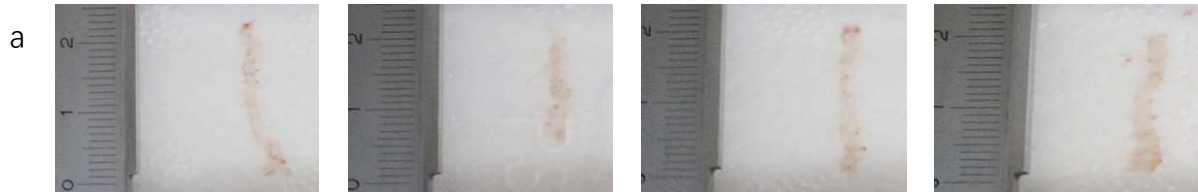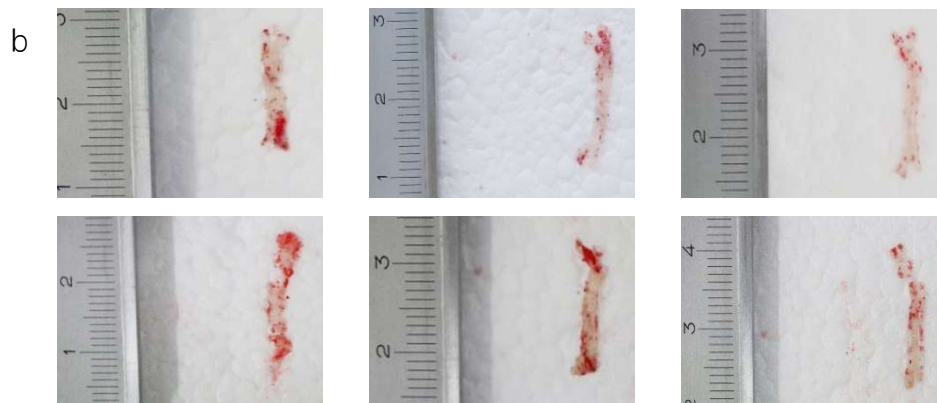

163

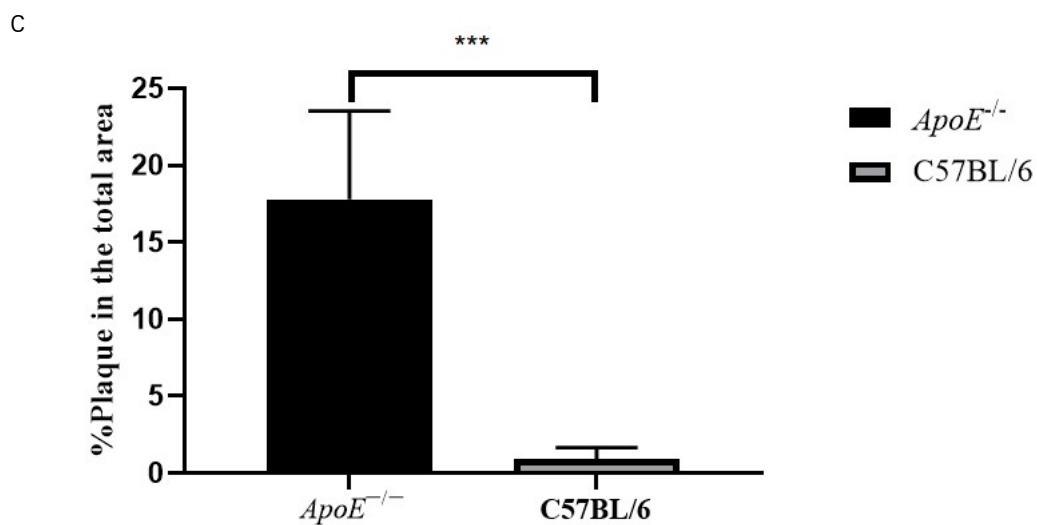

164

165

166

167

Figure 2 Results and quantitative analysis of oil red O staining of the whole aorta.

168

(a) Results of oil red O staining in the control group; (b) Results of oil red O staining in the experimental group; (c)

169

The comparison of the staining area ratio.

170

171

### 3.2 Differential proteins screening and functional annotation

172

173

174

175

176

177

178

179

The experimental group and the control group had 69 samples from seven time points (W0/W1/M1/M2/M3/M4/M5) for non-labelled LC-MS/MS quantification (one sample in the experimental group on W0 was insufficient). A total of 592 proteins identified with at least 2 unique peptides with FDR<1% were identified, and an average of 360 urine proteins were identified for each sample. The mass spectrometry proteomics data have been deposited to the ProteomeXchange Consortium (<http://proteomecentral.proteomexchange.org>) via the iProX partner repository<sup>[17]</sup> with the dataset identifier [PXD027610](https://proteomecentral.proteomexchange.org/dataset/PXD027610).

180

181

#### 3.2.1 Internal control of the experimental group

182

183

##### (1) Short-term effects of a high-fat diet

184

185

186

187

To identify the effects of a high-fat diet, after a week of a high-fat diet in *ApoE*<sup>-/-</sup> mice, urine samples collected from W0 and W1 were compared and analysed. A total of 12 proteins were significantly upregulated and 15 proteins were significantly downregulated at W1 (Table 1). Among them, 21 proteins or their family members have been reported to be associated with lipids.

188

189

190

191

192

193

194

GO analysis of these 27 proteins by DAVID showed that most of the annotated biological processes were related to lipid metabolism and glucose metabolism (Figure 3). At the same time, the differential proteins between W1 and W0 in the control group (Table S2) did not enrich for any significant changes in biological processes, indicating that the physiological state of mice did not change significantly at W1, while even a week of a high-fat diet induced huge changes in the animal urinary proteome, further demonstrating that the urinary proteome sensitively reflects changes in the body.



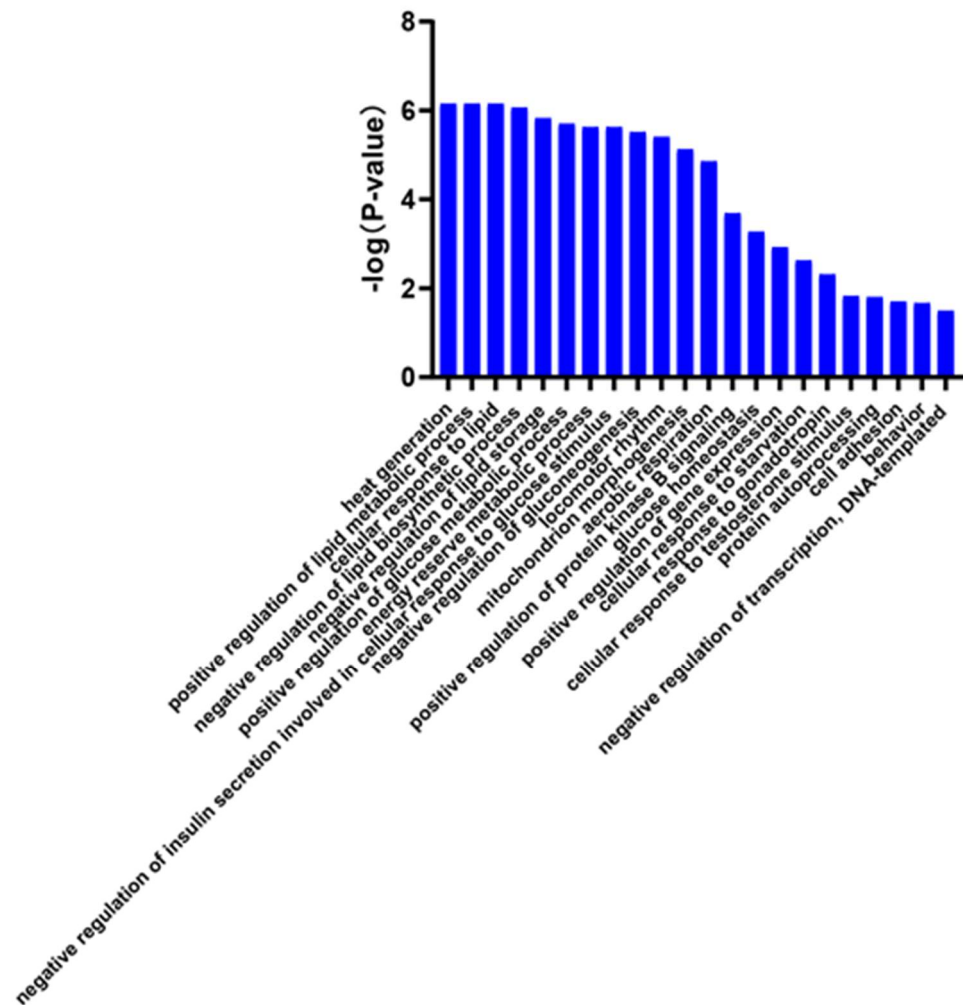

Figure 3 Biological processes enriched in differential proteins between week 1 and week 0 samples of the experimental group ( $p < 0.05$ ).

195  
196  
197  
198  
199  
200  
201  
202  
203  
204  
205  
206  
207  
208  
209  
210  
211  
212  
213  
214

## (2) Urinary proteome changes in whole process

Compared to W0, 51/69/86/65/88 proteins changed significantly at M1/M2/M3/M4/M5 in the experimental group, respectively. The Venn diagram (Figure 4) shows that a total of 17 proteins changed significantly at all five time points, and the DIA quantitative results show that these 17 proteins exhibited the same change trend at these time points. Another 18 proteins changed significantly at the last four time points, and the trend of change was the same at each time point (Table S3). Among them, 26 proteins or their family members have been previously reported to be related to lipid metabolism or cardiovascular diseases.

Major urinary proteins (MUPs) are members of the lipocalcin family, which can be isolated and transport various lipophilic molecules in the blood and other body fluids<sup>[18]</sup>. Knockout of mouse trefoil factor 2 protects against obesity in response to a high-fat diet<sup>[19]</sup>. Angiotensinogen plays a key role in fat cell metabolism and inflammation development<sup>[20]</sup>. Alpha1-antitrypsin has been reported as a biomarker of atherosclerosis<sup>[21]</sup>. It has been reported that CCN4 promotes the migration and proliferation of vascular smooth muscle cells by interacting with  $\alpha 5\beta 1$  integrin<sup>[22]</sup>, which plays a vital role in the occurrence and development of atherosclerosis. Regular monitoring of vitamin B12 status may help prevent atherosclerosis-related diseases, and anticobalamin 2 can



215 carry vitamin B12 [23]. Regenerated islet-derived protein  $\beta$ , an inflammatory marker, is of great  
216 significance for the recruitment of macrophages and tissue repair [24]. The level of  $\alpha$ -2-HS-  
217 glycoprotein is positively correlated with atherosclerotic substitution parameters, such as intima-  
218 media thickness (IMT) and arteriosclerosis [25]. The literature shows that gelsolin stabilizes actin  
219 filaments by binding to the ends of filaments, preventing monomer exchange. Its downregulation  
220 indicates that the cytoskeleton of vascular smooth muscle cells in the human coronary  
221 atherosclerotic medium is dysregulated [26]. It has been reported that *SCUBE2* may play an important  
222 role in the progression of atherosclerotic plaques through Hh signal transduction [27]. Type I collagen  
223 is an early biomarker of atherosclerosis [21].

224 Igk chain V-III region PC 7043, Igk chain V-II region 26-10 and immunoglobulin  $\kappa$  constant  
225 are all involved in the adaptive immune response. The haptoglobin polymorphism is related to the  
226 prevalence and clinical evolution of many inflammatory diseases, including atherosclerosis [28].  
227 MHCII antigen presentation has an important protective function in atherosclerosis [29]. Interleukin-  
228 18 plays a key role in atherosclerosis and plays a role in appetite control and the development of  
229 obesity [30]. According to the literature, compared to healthy controls, *LAMP-2* gene expression and  
230 protein levels in peripheral blood leukocytes of patients with coronary heart disease are significantly  
231 increased [31]. T-cadherin is essential for the accumulation of adiponectin in neointima and  
232 atherosclerotic plaque lesions [32]. Kidney androgen-regulated protein has also been reported in the  
233 urine of *ApoE*<sup>-/-</sup> mice fed a high-fat diet [21]. Fibronectin is an indicator of connective tissue  
234 formation during atherosclerosis [33]. Peripheral arterial occlusive disease (PAOD) is one of the  
235 primary manifestations of systemic atherosclerosis, and transthyretin and complement factor B are  
236 potential markers for monitoring plasma PAOD disease [34]. Serotransferrin plays an important role  
237 in atherosclerosis [35]. The differential expression of serine protease inhibitor A3 in blood vessels is  
238 significantly related to human atherosclerosis [36]. Prolactin plays a role in the proliferation of  
239 vascular smooth muscle cells, and the proliferation of vascular smooth muscle cells is a  
240 characteristic of cardiovascular diseases, such as hypertension and atherosclerosis [37].

a

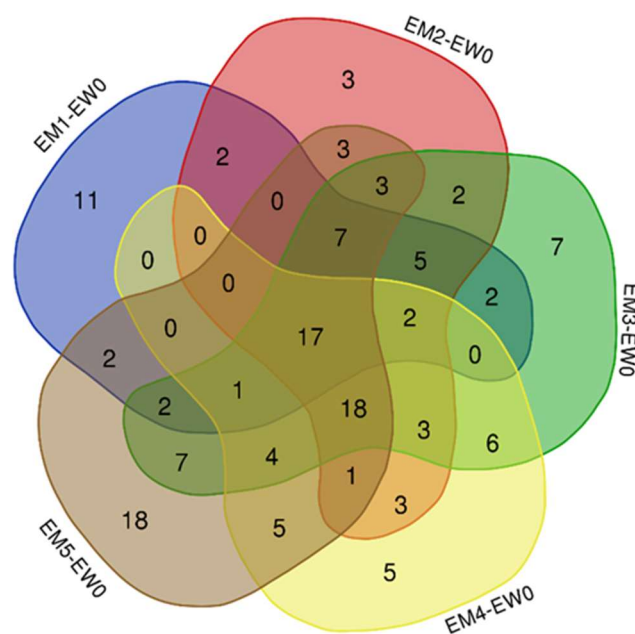

b

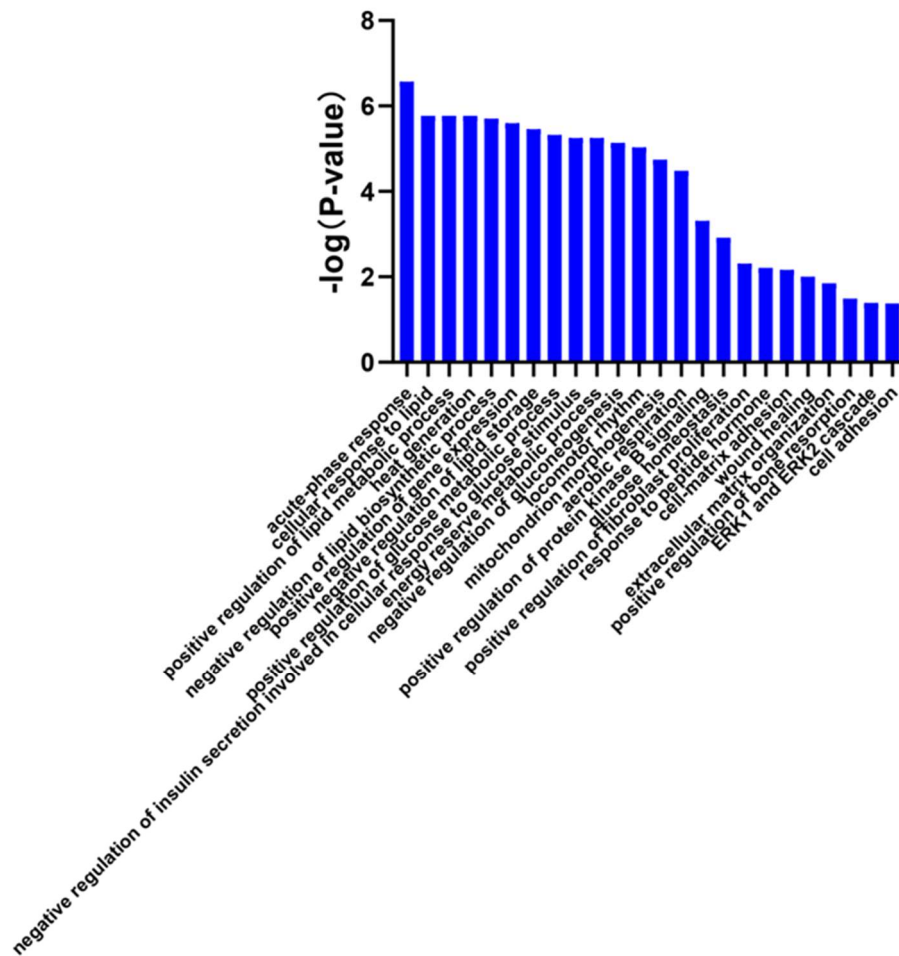

241

242

243

Figure 4 Differential proteins in the whole process.

244

(a) Venn diagram of differential proteins among the other time points (M1/M2/M3/M4/M5) and week 0 samples in the experimental group. (b) Biological processes enriched by continuously changing proteins in the internal control

245

of the experimental group ( $p < 0.05$ ).

246

247

248

The abovementioned differential proteins that continually changed during the whole process were analysed using DAVID for GO analysis (Figure 4), and the enriched biological processes are also shown in the figure.

249

250

251

The major urinary protein-induced lipid metabolism and glucose metabolism-related biological processes changed significantly; the acute phase reaction has been reported in the literature to be related to atherosclerosis [38]. The positive regulation of fibroblast proliferation also changed significantly, and vascular damage and dysfunction of adipose tissue around blood vessels promotes vasodilation, fibroblast activation and myofibroblast differentiation [39]. Wound healing is also related to atherosclerosis [40]. The extracellular matrix gives atherosclerotic lesion areas tensile strength, viscoelasticity, and compressibility [41], There are also reports showing a correlation between osteoporosis and atherosclerosis [42]. The ERK1/ERK2 pathway is involved in insulin (INS)

252

253

254

255

256

257

258

259 and thrombin-induced vascular smooth muscle cells, which play important roles in proliferation <sup>[43]</sup>.  
260 Cell adhesion also plays an important role in atherosclerosis <sup>[44]</sup>.

261 The internal control of the experimental group avoids the influence of genetic and dietary  
262 differences on the experimental results to the greatest extent, but the influence of biological growth  
263 and development is difficult to avoid. The results show that there are a variety of proteins that change  
264 continually throughout the progression of the disease and are closely related to the disease. It is  
265 worth noting that the differential proteins obtained using this comparison method, and the biological  
266 processes and pathways enriched by them exhibited a high degree of overlap at different time points,  
267 which may be difficult in enhancing the early diagnosis of the disease, so follow-up intergroup  
268 control was performed.

### 269 3.2.2 Intergroup control

270 The comparison of the results between the experimental group and the control group at the  
271 same time points showed that 44/16/54/23/48/57/46 differential proteins were obtained at  
272 W0/W1/M1/M2/M3/M4/M5, respectively. The details of proteins are shown in Table 2, and the  
273 overlap of differential proteins at different time points is shown in Figure S1. Under intergroup  
274 control conditions, there were significant differences in the differential proteins at each time point,  
275 but they were all closely related to lipids and cardiovascular diseases.

276 The differential proteins were analysed by DAVID for GO analysis, and the biological  
277 processes that changed significantly at different time points are shown in Figure 5. The biological  
278 processes related to lipid metabolism and glucose metabolism in the experimental group were  
279 significantly different from those in the control group at W0. At W0 and M4, the immune-related  
280 processes were significantly different. Differential proteins at M1 were primarily enriched in cell  
281 adhesion-related processes, while at M2, they were primarily enriched in redox reaction-related  
282 processes. At M3, wound healing began to appear, and there were many adhesion-related processes.  
283 In addition to a large number of immune-related processes, the positive regulation of fibroblast  
284 proliferation and the negative regulation of angiogenesis also appeared at M4. The processes related  
285 to phagocytosis and proteolysis began to appear at M5.

#### 286 (1) Effects of genetic factors

287 At W0, before a high-fat diet was administered to the experimental group, the only difference  
288 between the two groups was genetic factors. There were already significant differences in the  
289 biological processes related to lipid and glycometabolism, indicating that *ApoE* gene knockout  
290 greatly affects the lipid transport in mice in the experimental group, which is reflected by the urinary  
291 proteome very early. Acute phase reactions, immune responses, cytokines and proteolysis are also  
292 closely related to atherosclerosis [45-48].

#### 293 (2) Urinary proteome changes during whole process

294 The literature shows that during the early stages of atherosclerosis, low-density lipoprotein  
295 (LDL) particles accumulate in the arterial intima, thereby being protected from plasma antioxidants,  
296 undergoing oxidation and other modifications and having proinflammatory and immunogenic  
297 properties. Classic monocytes circulating in the blood can exhibit anti-inflammatory functions and  
298 bind to the adhesion molecules expressed by activated endothelial cells to enter the inner membrane.  
299 Once in the inner membrane, monocytes can mature into macrophages, which express scavenger  
300 receptors that bind to lipoprotein particles and then become foam cells, finally forming the core of  
301 atherosclerotic plaques. T lymphocytes can also enter the inner membrane to regulate the functions  
302 of natural immune cells, endothelial cells and smooth muscle cells. The smooth muscle cells in the  
303 media can migrate to the inner membrane under the action of leukocytes to secrete extracellular  
304 matrix and form a fibrous cap [49]. During the exploration of this experiment, at week 1, the  
305 differentially expressed proteins between the experimental and control groups were related to the  
306 differentiation of epithelial cells, and cell adhesion was enriched in M1 macrophages, which may  
307 be related to the adhesion of monocytes. Differential proteins between the experimental and control  
308 groups at M2 were related to biological processes related to redox, which may be related to the  
309 redox of LDL particles. Cell adhesion also changes at M3, which may involve the recruitment of  
310 phagocytes. Numerous immune-related biological processes changed in M4, indicating the  
311 participation of immune cells, such as T cells. The regulation of fibroblast proliferation may be

312 related to the formation of fibrous caps. Enriched results revealed that proteolysis changed  
313 significantly at M5. It has been reported that activated macrophages can secrete proteolytic enzymes  
314 and degrade matrix components. The loss of matrix components may subsequently lead to plaque  
315 instability and increase the risk of plaque rupture and thrombosis <sup>[50]</sup>. Fibrin dissolution also plays  
316 an important role in the development of atherosclerosis <sup>[51]</sup>.

317 The biological processes of the enrichment of differential proteins at different time points can  
318 correspond to the occurrence and development of atherosclerosis, indicating that the urinary  
319 proteome has the potential to be used to monitor the disease process.

320 After a week of a high-fat diet in the experimental group, the protein kinase B signalling  
321 pathway changed. It is reported to play an important role in the survival, proliferation and migration  
322 of macrophages and may affect the development of atherosclerosis <sup>[52]</sup>. After a month of a high-fat  
323 diet, many biological processes underwent significant changes. Studies have shown that urinary  
324 sodium excretion is the decisive factor of carotid intima-media thickness, which is an indicator of  
325 atherosclerosis <sup>[53]</sup>. The classical pathway of complement activation is also related to atherosclerosis  
326 <sup>[54]</sup>. Copper and isotype cysteine can interact to generate free radicals, thereby oxidizing LDL, which  
327 has been found in atherosclerotic plaques <sup>[55]</sup>. At M2, oestrogen has been reported to have a variety  
328 of anti-atherosclerotic properties, including affecting plasma lipoprotein levels and stimulating the  
329 production of prostacyclin and nitric oxide <sup>[56]</sup>. At M3, wound healing is also associated with  
330 atherosclerosis <sup>[40]</sup>. For the biological processes changed at M4, the ERK1/ERK2 pathway plays an  
331 important role in the proliferation of vascular smooth muscle cells induced by insulin (INS) and  
332 thrombin <sup>[43]</sup>. Alternative pathways of complement activation and major histocompatibility complex  
333 family II have been reported to be associated with atherosclerosis <sup>[57, 58]</sup>. In the enrichment of  
334 differential proteins at M5, chaperone-mediated autophagy (CMA) plays an important upstream  
335 regulatory role in lipid metabolism and lipid metabolism in liver cells <sup>[59]</sup>.

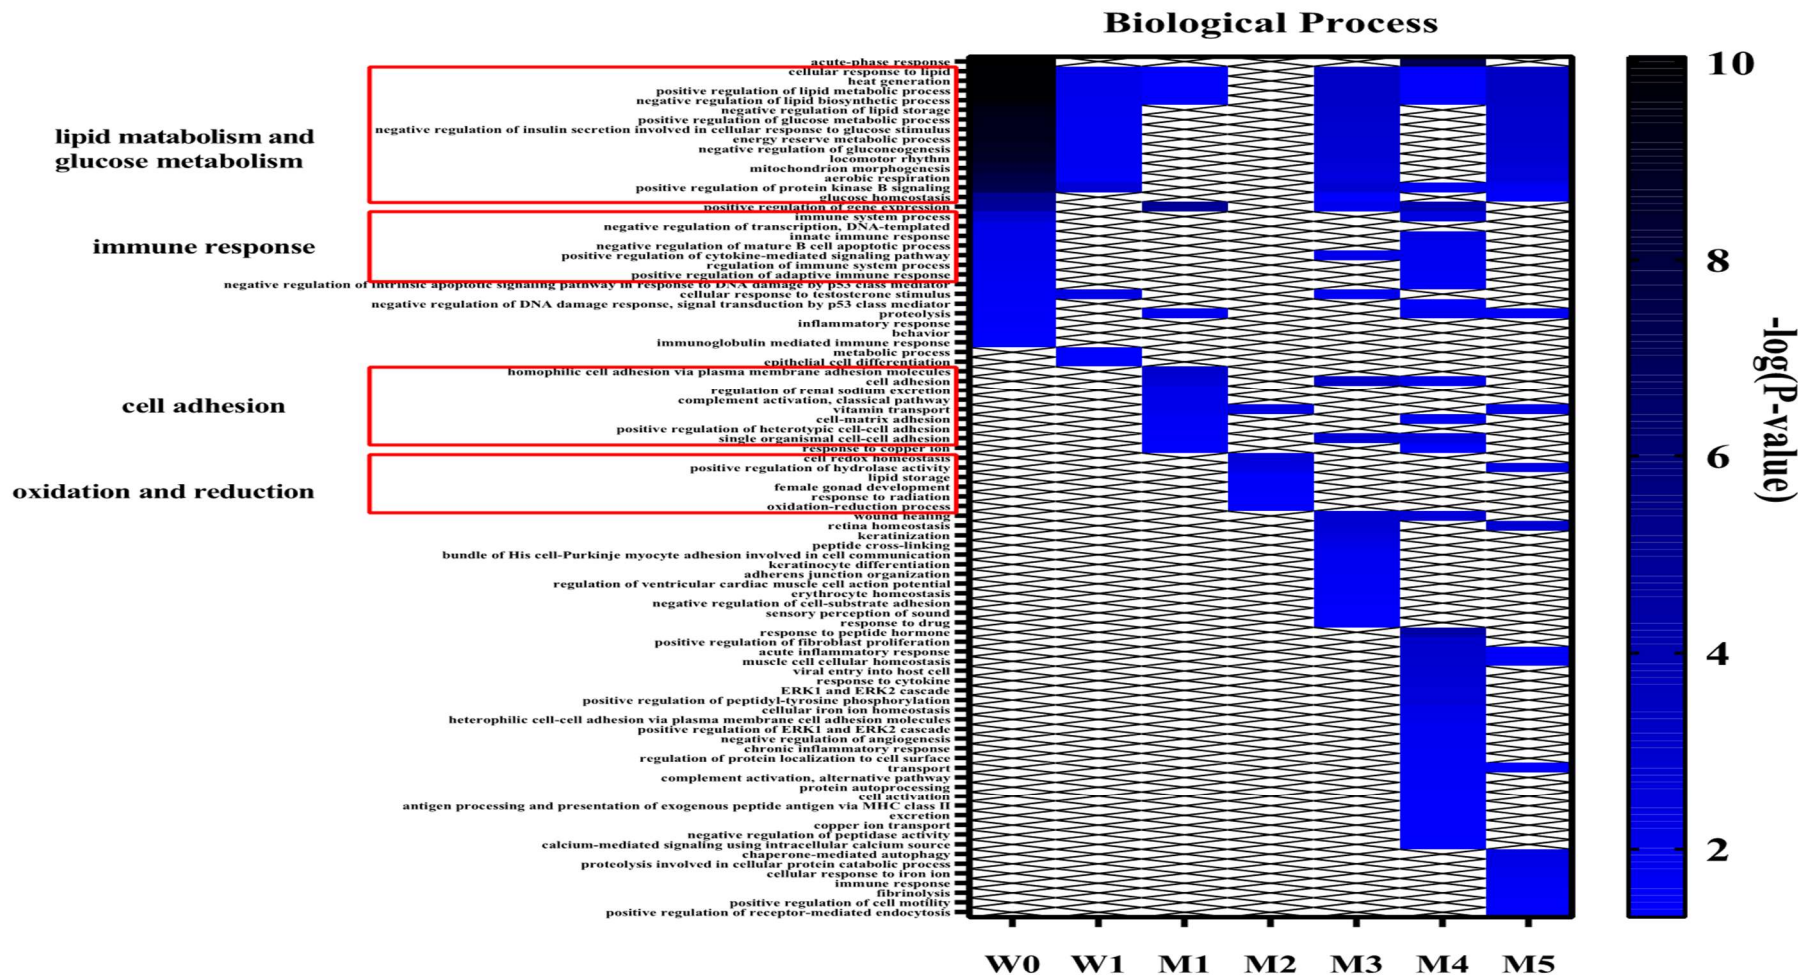

336

337

Figure 5 Functional annotation of differential proteins at different time points between the experimental and control groups ( $p < 0.05$ )



338

339 When the experimental group was compared to the control group, there was a large difference  
340 in W0, demonstrating that the urinary proteome reflects even slight difference between the groups.  
341 In the subsequent control results at each time point, the degree of overlap in the differential proteins  
342 was small, but they were mostly related to lipids and cardiovascular diseases. The enriched  
343 biological processes also correspond to the progression of atherosclerosis, indicating that the urinary  
344 proteome is useful to monitor the disease process. However, as mentioned before, this type of  
345 comparison does not take the influence of diet and other factors into account.

### 346 3.3 Chemical modifications of proteins

347 To further explore the effect of high-fat diet on chemical modifications of urine proteins, a total  
348 of 15 samples were selected at three time points (EW0/EM5/CM5). After data retrieval (.raw) based  
349 on open-pFind software, the analysis results were exported in pBuild.

350 A total of 923 different chemical modification types were identified in 15 samples, of which  
351 468 chemical modification types were identified in the EW0 group, 748 chemical modification types  
352 were identified in the EM5 group, and 611 chemical modification types were identified in the CM5  
353 group.

a

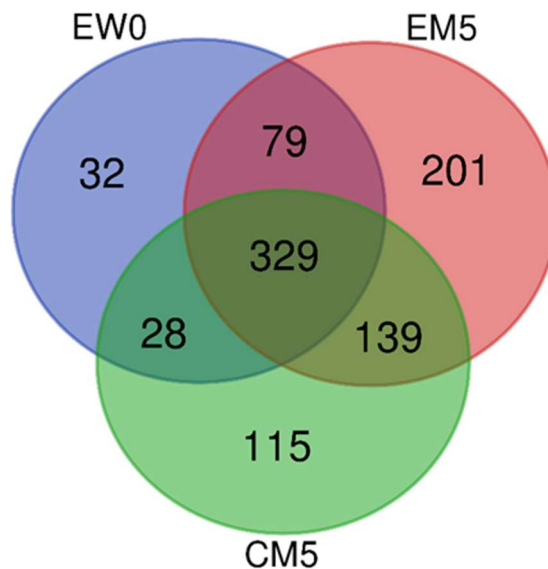



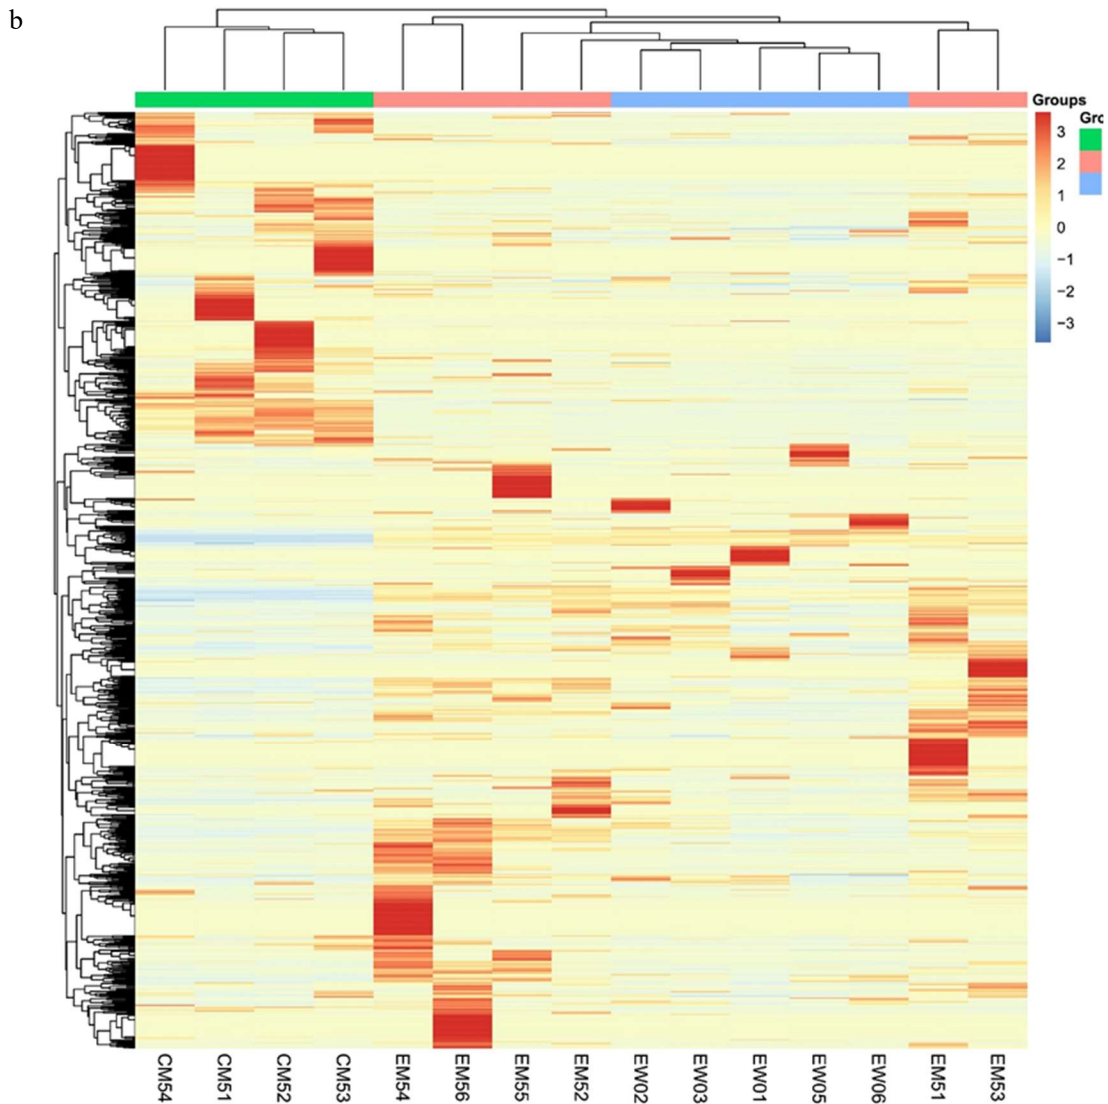

354

355

356

Figure 6 Chemical modifications among the three groups.

357

(a) Venn diagram of modification types among the three groups. (b) Unsupervised clustering of all the

358

modification types in the three groups.

359

360

361

An unsupervised cluster analysis of all modifications found that the CM5 group was well distinguished from the other two groups (Figure 6). The percentages of different modification types in the EW0 group and the EM5 group were quantified to identify the modification changes that occurred in the internal controls. Among them, one modification type was unique to the EW0 group and existed in more than 4 samples (the total number of samples was 5), 23 modification types were unique to the EM5 group and existed in more than 5 samples (the total number of samples was 6), there are 68 types of modifications shared by the two groups, and there were significant differences ( $FC \geq 1.5$  or  $\leq 0.67$ ,  $p < 0.05$ ). At the same time, the proportions of different types of modified sites in the CM5 group and the EM5 group were quantified, and the difference between the experimental group and the control group was analysed. Among them, 8 modification types were unique to the CM5 group and existed in more than 3 samples (the total number of samples was 4), and 19

370

371 modification types were unique to the EM5 group and existed in more than 5 samples (the total  
372 number of samples was 6). There were 72 types of modifications that were shared by the two groups,  
373 and there were significant differences ( $FC \geq 1.5$  or  $\leq 0.67$ ,  $p < 0.05$ ) (see Table S5 for details).

374

375 To reduce the false negative influence caused by the open search mode, a restricted search  
376 method was used for verification. Modification types that accounted for the top five modification  
377 sites in the open search were fixed, modification types that were unique in a group and existed in  
378 each sample and modification types that have been reported related to lipids in the literature are  
379 selected. Twenty modifications in the EM5-EW0 group and 25 modifications in the EW5-CM5  
380 group were selected, and the proportion of modified sites in the total number of sites was calculated  
381 (Table S6). The screening criteria were  $FC \geq 1.5$  or  $\leq 0.67$  and  $p < 0.05$ . Finally, in the internal control  
382 of the experimental group (EM5-EW0), the N-terminal carbamylation (Carbamyl[*AnyN-term*]), the  
383 CHDH modification of aspartic acid (CHDH[D]), the tryptophan by kynurenine acid substitution  
384 (Trp->Kynurenin[W]), oxidation modification of proline (Oxidation[P]), cysteine modification of  
385 cysteine (Cysteinyll[C]), sulfur dioxide modification of cysteine (SulfurDioxide[C]), the  
386 NO\_SMX\_SIMD modification of cysteine (NO\_SMX\_SIMD[C]) and the Delta\_H(2)C(3)  
387 modification of lysine (Delta\_H(2)C(3)[K]) significantly changed. In the comparison between the  
388 experimental and control groups (EM5-CM5), the guanidine modification of lysine (Guanidinyl[K]),  
389 the phosphouridine modification of tyrosine (PhosphoUridine[Y]), the N-terminal carbamoyl  
390 Modification (Carbamyl[*AnyN-term*]), Delta\_H(2)C(2) modification (Delta\_H(2)C(2)[*AnyN-*  
391 *term*]) at the N-terminus and Dihydroxyimidazolidine modification of arginine  
392 (Dihydroxyimidazolidine) [R]) showed significant changes.

| UniProt | Human UniProt | Protein Name                                            | P-value | Fold Change | References |
|---------|---------------|---------------------------------------------------------|---------|-------------|------------|
| B5X0G2  | No            | Major urinary protein 17                                | 0.0008  | 7.92        | [18]       |
| P11588  | No            | Major urinary protein 1                                 | 0.0007  | 7.84        | [18]       |
| A2BIM8  | No            | Major urinary protein 18                                | 0.0014  | 3.19        | [18]       |
| Q9JI02  | No            | Secretoglobin family 2B member 20                       | 0.0488  | 2.75        | —          |
| Q5FW60  | No            | Major urinary protein 20                                | 0.0121  | 2.65        | [18]       |
| Q07797  | Q08380        | Galectin-3-binding protein                              | 0.0077  | 2.59        | [60, 61]   |
| Q61838  | No            | Pregnancy zone protein                                  | 0.0411  | 2.46        | [62]       |
| P11591  | No            | Major urinary protein 5                                 | 0.0136  | 2.40        | [18]       |
| Q64695  | Q9UNN8        | Endothelial protein C receptor                          | 0.0150  | 2.23        | [63]       |
| Q91WR8  | P59796        | Glutathione peroxidase 6                                | 0.0469  | 1.99        | [64]       |
| P06797  | P07711        | Cathepsin L1                                            | 0.0146  | 1.84        | [65]       |
| P13597  | P05362        | Intercellular adhesion molecule 1                       | 0.0432  | 1.66        | [66, 67]   |
| Q9JK39  | A8MVZ5        | Butyrophilin-like protein 10                            | 0.0446  | 0.60        | —          |
| P01898  | P01891        | H-2 class I histocompatibility antigen, Q10 alpha chain | 0.0429  | 0.59        | [68]       |
| P55292  | Q02487        | Desmocollin-2                                           | 0.0160  | 0.57        | [69, 70]   |
| P23780  | P16278        | Beta-galactosidase                                      | 0.0384  | 0.56        | —          |
| Q60648  | P17900        | Ganglioside GM2 activator                               | 0.0382  | 0.56        | [71]       |
| P00688  | P04746        | Pancreatic alpha-amylase                                | 0.0311  | 0.55        | [72]       |
| P70269  | P14091        | Cathepsin E                                             | 0.0299  | 0.54        | [73]       |
| P11859  | P01019        | Angiotensinogen                                         | 0.0338  | 0.51        | [20]       |
| Q6UGQ3  | No            | Secretoglobin family 2B member 2                        | 0.0270  | 0.49        | —          |
| O88322  | Q14112        | Nidogen-2                                               | 0.0004  | 0.43        | —          |
| O88968  | P20062        | Transcobalamin-2                                        | 0.0155  | 0.39        | [23]       |
| P11087  | P02452        | Collagen alpha-1(I) chain                               | 0.0080  | 0.34        | [21]       |

|     |        |        |                                           |        |      |      |
|-----|--------|--------|-------------------------------------------|--------|------|------|
| 393 | Q4KML4 | Q9P1F3 | Costars family protein ABRACL             | 0.0181 | 0.28 | —    |
| 394 | P35230 | Q06141 | Regenerating islet-derived protein 3-beta | 0.0012 | 0.24 | [24] |
| 395 | A2AEP0 | No     | Odorant-binding protein 1b                | 0.0213 | 0.20 | [74] |

396

397

Table 1 Details of differential proteins between week 1 and week 0 samples in the experimental group.



|        |        |                                                     |      |      |       |      |      |      |      |      |
|--------|--------|-----------------------------------------------------|------|------|-------|------|------|------|------|------|
| Q91WR8 | P59796 | Glutathione peroxidase 6                            | 0.47 | —    | —     | —    | —    | 3.34 | —    | [64] |
| Q62395 | Q07654 | Trefoil factor 3                                    | 0.46 | —    | —     | —    | —    | —    | —    | [19] |
| Q9DAK9 | Q9NRX4 | 14 kDa phosphohistidine phosphatase                 | 0.46 | —    | —     | —    | —    | —    | 2.02 | [85] |
| O88188 | O95711 | Lymphocyte antigen 86                               | 0.45 | —    | —     | —    | —    | —    | —    | —    |
| Q60932 | P21796 | Voltage-dependent anion-selective channel protein 1 | 0.44 | 0.45 | —     | 3.68 | —    | —    | —    | [86] |
| P11589 | No     | Major urinary protein 2                             | 0.44 | —    | 3.82  | —    | 1.98 | 6.19 | 3.16 | [18] |
| Q62266 | No     | Cornifin-A                                          | 0.43 | 0.49 | —     | —    | —    | —    | —    | —    |
| P17047 | P13473 | Lysosome-associated membrane glycoprotein 2         | 0.42 | —    | —     | —    | 2.19 | 3.45 | 2.44 | [31] |
| P0CW03 | No     | Lymphocyte antigen 6C2                              | 0.41 | —    | —     | —    | —    | —    | —    | —    |
| Q60590 | P02763 | Alpha-1-acid glycoprotein 1                         | 0.41 | —    | —     | —    | —    | 0.08 | —    | [83] |
| P01665 | No     | Ig kappa chain V-III region PC 7043                 | 0.41 | —    | —     | —    | —    | 7.91 | 2.38 | —    |
| P04939 | No     | Major urinary protein 3                             | 0.39 | —    | —     | —    | —    | —    | —    | [18] |
| Q6SJK5 | Q6UXZ3 | CMRF35-like molecule 3                              | 0.35 | —    | —     | —    | —    | —    | 0.56 | —    |
| Q64695 | Q9UNN8 | Endothelial protein C receptor                      | 0.31 | —    | —     | —    | —    | —    | —    | [63] |
| E9Q557 | P15924 | Desmoplakin                                         | 0.29 | —    | —     | —    | 3.82 | —    | —    | —    |
| P11591 | No     | Major urinary protein 5                             | 0.27 | —    | —     | —    | —    | 4.49 | 2.30 | [18] |
| P51437 | P49913 | Cathelicidin antimicrobial peptide                  | 0.24 | —    | —     | —    | —    | —    | —    | [87] |
| Q5FW60 | No     | Major urinary protein 20                            | 0.23 | —    | —     | —    | —    | —    | 2.14 | [18] |
| A2BIM8 | No     | Major urinary protein 18                            | 0.20 | 0.50 | 6.10  | —    | 2.10 | —    | —    | [18] |
| Q61646 | P00738 | Haptoglobin                                         | 0.14 | —    | —     | —    | —    | 0.09 | —    | [28] |
| P11588 | No     | Major urinary protein 1                             | 0.07 | 0.45 | —     | —    | 2.17 | —    | —    | [18] |
| B5X0G2 | No     | Major urinary protein 17                            | 0.06 | 0.34 | 28.79 | —    | —    | —    | 4.06 | [18] |
| Q9JI02 | No     | Secretoglobin family 2B member 20                   | —    | 2.83 | —     | —    | 0.23 | —    | —    | —    |
| Q01279 | P00533 | Epidermal growth factor receptor                    | —    | 1.52 | —     | —    | —    | —    | —    | [88] |
| P10605 | P07858 | Cathepsin B                                         | —    | 0.63 | 0.44  | —    | —    | —    | —    | [89] |
| P50429 | P15848 | Arylsulfatase B                                     | —    | 0.56 | —     | —    | —    | —    | —    | [90] |

|        |        |                                                            |   |      |       |      |      |      |      |       |
|--------|--------|------------------------------------------------------------|---|------|-------|------|------|------|------|-------|
| Q571E4 | P34059 | N-acetylgalactosamine-6-sulfatase                          | — | 0.52 | —     | —    | —    | 3.57 | —    | —     |
| Q9JK39 | A8MVZ5 | Butyrophilin-like protein 10                               | — | 0.50 | —     | —    | —    | —    | —    | —     |
| P23780 | P16278 | Beta-galactosidase                                         | — | 0.48 | 0.15  | —    | 0.28 | —    | —    | —     |
| P70269 | P14091 | Cathepsin E                                                | — | 0.42 | —     | —    | —    | 2.14 | —    | [73]  |
| O35887 | O43852 | Calumenin                                                  | — | 0.40 | —     | —    | 2.88 | 4.38 | 1.88 | [91]  |
| Q9EP95 | Q9BQ08 | Resistin-like alpha                                        | — | 0.27 | —     | —    | —    | —    | 0.20 | [92]  |
| P20152 | P08670 | Vimentin                                                   | — | —    | 16.24 | —    | —    | —    | —    | [93]  |
| Q8K0E8 | P02675 | Fibrinogen beta chain                                      | — | —    | 8.28  | —    | —    | —    | —    | [94]  |
| P16858 | P04406 | Glyceraldehyde-3-phosphate dehydrogenase                   | — | —    | 4.72  | —    | —    | —    | —    | [95]  |
| Q9WTR5 | P55290 | Cadherin-13                                                | — | —    | 2.78  | —    | —    | —    | —    | [32]  |
| Q00897 | P01009 | Alpha-1-antitrypsin 1-4                                    | — | —    | 2.57  | —    | —    | —    | 3.27 | [21]  |
| O09164 | P08294 | Extracellular superoxide dismutase [Cu-Zn]                 | — | —    | 2.11  | 1.56 | —    | 3.37 | —    | [96]  |
| P11276 | P02751 | Fibronectin                                                | — | —    | 0.58  | —    | —    | 2.15 | —    | [33]  |
| Q9Z0J0 | P61916 | NPC intracellular cholesterol transporter 2                | — | —    | 0.57  | —    | —    | —    | —    | [97]  |
| Q8BPB5 | Q12805 | EGF-containing fibulin-like extracellular matrix protein 1 | — | —    | 0.53  | 0.46 | —    | —    | —    | —     |
| Q8BZT5 | Q9H756 | Leucine-rich repeat-containing protein 19                  | — | —    | 0.52  | 0.50 | 0.55 | —    | —    | [98]  |
| P21614 | P02774 | Vitamin D-binding protein                                  | — | —    | 0.50  | —    | —    | —    | 0.49 | [99]  |
| P16675 | P10619 | Lysosomal protective protein                               | — | —    | 0.49  | —    | —    | —    | 2.51 | —     |
| Q61147 | P00450 | Ceruloplasmin                                              | — | —    | 0.49  | —    | —    | 0.35 | —    | [100] |
| P23953 | No     | Carboxylesterase 1C                                        | — | —    | 0.48  | —    | —    | —    | —    | —     |
| Q61398 | Q15113 | Procollagen C-endopeptidase enhancer 1                     | — | —    | 0.48  | —    | —    | —    | —    | [101] |
| O35664 | P48551 | Interferon alpha/beta receptor 2                           | — | —    | 0.47  | —    | —    | —    | —    | [102] |
| P11859 | P01019 | Angiotensinogen                                            | — | —    | 0.45  | —    | —    | 0.15 | —    | [20]  |
| P01898 | P01891 | H-2 class I histocompatibility antigen, Q10 alpha chain    | — | —    | 0.45  | —    | —    | —    | 2.03 | [68]  |
| C0HKG5 | No     | Ribonuclease T2-A                                          | — | —    | 0.42  | 0.60 | —    | —    | —    | —     |
| Q61271 | P36896 | Activin receptor type-1B                                   | — | —    | 0.42  | —    | —    | 3.64 | —    | —     |



|        |        |                                                              |   |   |      |      |      |      |      |            |
|--------|--------|--------------------------------------------------------------|---|---|------|------|------|------|------|------------|
| O88968 | P20062 | Transcobalamin-2                                             | — | — | 0.40 | —    | —    | —    | —    | [23]       |
| Q9Z0L8 | Q92820 | Gamma-glutamyl hydrolase                                     | — | — | 0.39 | —    | —    | —    | —    | [103, 104] |
| P35459 | Q14210 | Lymphocyte antigen 6D                                        | — | — | 0.39 | 0.57 | —    | —    | —    | —          |
| Q61129 | P05156 | Complement factor I                                          | — | — | 0.38 | —    | —    | —    | —    | —          |
| P01878 | No     | Ig alpha chain C region                                      | — | — | 0.38 | —    | 5.03 | —    | —    | —          |
| P55292 | Q02487 | Desmocollin-2                                                | — | — | 0.38 | —    | 3.72 | —    | —    | [69, 70]   |
| Q9JJS0 | Q9NQ36 | Signal peptide, CUB and EGF-like domain-containing protein 2 | — | — | 0.35 | —    | —    | —    | —    | [27]       |
| Q9Z319 | Q9Y5Q5 | Atrial natriuretic peptide-converting enzyme                 | — | — | 0.35 | —    | —    | —    | —    | [105]      |
| P09036 | P00995 | Serine protease inhibitor Kazal-type 1                       | — | — | 0.34 | —    | —    | —    | —    | —          |
| Q4KML4 | Q9P1F3 | Costars family protein ABRACL                                | — | — | 0.33 | —    | 2.18 | —    | —    | —          |
| Q925F2 | Q96AP7 | Endothelial cell-selective adhesion molecule                 | — | — | 0.32 | —    | —    | —    | 0.48 | [106]      |
| O89020 | P43652 | Afamin                                                       | — | — | 0.31 | 0.50 | —    | —    | —    | [107]      |
| Q9DAU7 | Q14508 | WAP four-disulfide core domain protein 2                     | — | — | 0.31 | —    | —    | —    | —    | —          |
| Q8BND5 | O00391 | Sulfhydryl oxidase 1                                         | — | — | 0.30 | 0.40 | —    | —    | 0.61 | —          |
| P09803 | P12830 | Cadherin-1                                                   | — | — | 0.29 | —    | 2.78 | 2.34 | —    | [28]       |
| P02816 | P12273 | Prolactin-inducible protein homolog                          | — | — | 0.27 | —    | 0.45 | —    | —    | [37]       |
| Q91WR6 | Q9NU53 | Glycoprotein integral membrane protein 1                     | — | — | 0.26 | 0.59 | —    | —    | 0.45 | —          |
| Q3UDR8 | Q9GZM5 | Protein YIPF3                                                | — | — | 0.26 | —    | —    | —    | —    | —          |
| Q6UGQ3 | No     | Secretoglobin family 2B member 2                             | — | — | 0.25 | —    | —    | —    | 2.03 | —          |
| Q9D3H2 | No     | Odorant-binding protein 1a                                   | — | — | 0.25 | —    | 1.75 | —    | —    | [74]       |
| P20060 | P07686 | Beta-hexosaminidase subunit beta                             | — | — | 0.23 | —    | 0.35 | —    | —    | —          |
| Q8K1H9 | Q9NY56 | Odorant-binding protein 2a                                   | — | — | 0.21 | —    | 0.31 | 0.21 | —    | [74]       |
| A2AEP0 | No     | Odorant-binding protein 1b                                   | — | — | 0.20 | —    | —    | —    | —    | [74]       |
| Q8C6C9 | Q6P5S2 | Protein LEG1 homolog                                         | — | — | 0.15 | —    | 0.44 | —    | —    | —          |
| P00688 | P04746 | Pancreatic alpha-amylase                                     | — | — | 0.14 | —    | —    | 0.32 | —    | [72]       |

|        |        |                                             |   |   |      |      |      |      |      |            |
|--------|--------|---------------------------------------------|---|---|------|------|------|------|------|------------|
| P10287 | P22223 | Cadherin-3                                  | — | — | 0.13 | —    | 3.19 | 5.62 | —    | [28]       |
| P56386 | P60022 | Beta-defensin 1                             | — | — | —    | 3.94 | —    | 5.25 | 1.90 | [108]      |
| P10639 | P10599 | Thioredoxin                                 | — | — | —    | 3.63 | —    | —    | —    | [109]      |
| O88844 | O75874 | Isocitrate dehydrogenase [NADP] cytoplasmic | — | — | —    | 2.71 | —    | —    | —    | [110]      |
| Q00623 | P02647 | Apolipoprotein A-I                          | — | — | —    | 2.07 | —    | —    | 0.36 | [111]      |
| P0CG49 | P0CG47 | Polyubiquitin-B                             | — | — | —    | 1.98 | —    | —    | —    | [112]      |
| Q03404 | Q03403 | Trefoil factor 2                            | — | — | —    | 1.69 | 2.11 | 8.94 | —    | [19]       |
| P15947 | P06870 | Kallikrein-1                                | — | — | —    | 0.66 | —    | 1.74 | —    | [113]      |
| O55186 | P13987 | CD59A glycoprotein                          | — | — | —    | 0.61 | —    | 2.53 | —    | [114]      |
| Q921I1 | P02787 | Serotransferrin                             | — | — | —    | 0.57 | 0.43 | 0.09 | 0.21 | [35]       |
| Q60648 | P17900 | Ganglioside GM2 activator                   | — | — | —    | 0.51 | —    | —    | 2.27 | [72]       |
| O88792 | Q9Y624 | Junctional adhesion molecule A              | — | — | —    | 0.49 | —    | —    | —    | [115]      |
| P07724 | P02768 | Albumin                                     | — | — | —    | 0.38 | —    | 0.38 | 0.43 | [116]      |
| O70554 | No     | Small proline-rich protein 2B               | — | — | —    | —    | 7.98 | —    | 3.26 | [117, 118] |
| Q62267 | No     | Cornifin-B                                  | — | — | —    | —    | 5.69 | —    | —    | —          |
| P35700 | Q06830 | Peroxiredoxin-1                             | — | — | —    | —    | 3.75 | —    | —    | [119]      |
| P18761 | P23280 | Carbonic anhydrase 6                        | — | — | —    | —    | 3.37 | —    | —    | [120]      |
| P01631 | No     | Ig kappa chain V-II region 26-10            | — | — | —    | —    | 3.29 | 3.00 | —    | —          |
| P11087 | P02452 | Collagen alpha-1(I) chain                   | — | — | —    | —    | 3.21 | —    | —    | [21]       |
| P01837 | P01834 | Immunoglobulin kappa constant               | — | — | —    | —    | 3.19 | —    | —    | —          |
| Q99N23 | No     | Carbonic anhydrase 15                       | — | — | —    | —    | 2.91 | —    | —    | [120]      |
| P10126 | P68104 | Elongation factor 1-alpha 1                 | — | — | —    | —    | 2.90 | —    | —    | [121]      |
| P70663 | Q14515 | SPARC-like protein 1                        | — | — | —    | —    | 2.74 | —    | —    | —          |
| Q60847 | Q99715 | Collagen alpha-1(XII) chain                 | — | — | —    | —    | 2.68 | —    | —    | [21]       |
| P29533 | P19320 | Vascular cell adhesion protein 1            | — | — | —    | —    | 2.62 | 2.12 | —    | [122]      |
| O55135 | P56537 | Eukaryotic translation initiation factor 6  | — | — | —    | —    | 2.55 | —    | —    | —          |

|        |        |                                               |   |   |   |   |      |       |      |          |
|--------|--------|-----------------------------------------------|---|---|---|---|------|-------|------|----------|
| O54775 | O95388 | CCN family member 4                           | — | — | — | — | 2.47 | —     | 0.47 | [22]     |
| P01843 | No     | Ig lambda-1 chain C region                    | — | — | — | — | 2.45 | —     | —    | —        |
| Q9DBV4 | Q9BRK3 | Matrix remodeling-associated protein 8        | — | — | — | — | 1.70 | —     | 1.80 | —        |
| O35608 | O15123 | Angiopoietin-2                                | — | — | — | — | 1.61 | —     | —    | [123]    |
| Q07797 | Q08380 | Galectin-3-binding protein                    | — | — | — | — | 1.59 | —     | —    | [60]     |
| Q04519 | P17405 | Sphingomyelin phosphodiesterase               | — | — | — | — | 0.57 | —     | 1.89 | [124]    |
| Q61838 | No     | Pregnancy zone protein                        | — | — | — | — | 0.52 | —     | —    | [62]     |
| Q08423 | P04155 | Trefoil factor 1                              | — | — | — | — | —    | 12.79 | —    | [19]     |
| O08997 | O00244 | Copper transport protein ATOX1                | — | — | — | — | —    | 8.07  | —    | [125]    |
| P03977 | No     | Ig kappa chain V-III region 50S10.1           | — | — | — | — | —    | 4.79  | —    | —        |
| P42567 | P42566 | Epidermal growth factor receptor substrate 15 | — | — | — | — | —    | 4.53  | —    | [88]     |
| Q91X17 | P07911 | Uromodulin                                    | — | — | — | — | —    | 4.22  | —    | [126]    |
| P57096 | O43653 | Prostate stem cell antigen                    | — | — | — | — | —    | 3.53  | —    | —        |
| P70699 | P10253 | Lysosomal alpha-glucosidase                   | — | — | — | — | —    | 3.37  | —    | [127]    |
| P01132 | P01133 | Pro-epidermal growth factor                   | — | — | — | — | —    | 3.13  | —    | —        |
| P32507 | Q92692 | Nectin-2                                      | — | — | — | — | —    | 3.03  | —    | [128]    |
| Q5SSE9 | Q86UQ4 | ATP-binding cassette sub-family A member 13   | — | — | — | — | —    | 2.92  | —    | —        |
| P06797 | O60911 | Cathepsin L1                                  | — | — | — | — | —    | 2.63  | —    | [65, 73] |
| Q8R242 | Q01459 | Di-N-acetylchitobiase                         | — | — | — | — | —    | 2.47  | —    | —        |
| Q9Z0K8 | O95497 | Pantetheinase                                 | — | — | — | — | —    | 2.32  | 3.65 | —        |
| O54782 | Q9Y2E5 | Epididymis-specific alpha-mannosidase         | — | — | — | — | —    | 1.99  | —    | —        |
| P22599 | P01009 | Alpha-1-antitrypsin 1-2                       | — | — | — | — | —    | 0.50  | —    | [21]     |
| P13634 | P00915 | Carbonic anhydrase 1                          | — | — | — | — | —    | 0.39  | 3.37 | [120]    |
| P20918 | P00747 | Plasminogen                                   | — | — | — | — | —    | 0.32  | 0.63 | [129]    |
| P07759 | P01011 | Serine protease inhibitor A3K                 | — | — | — | — | —    | 0.26  | —    | [36]     |
| P02088 | P68871 | Hemoglobin subunit beta-1                     | — | — | — | — | —    | 0.24  | —    | —        |

|        |        |                                                         |   |   |   |   |   |      |      |       |
|--------|--------|---------------------------------------------------------|---|---|---|---|---|------|------|-------|
| P01027 | P01024 | Complement C3                                           | — | — | — | — | — | 0.20 | —    | [54]  |
| Q00898 | P01009 | Alpha-1-antitrypsin 1-5                                 | — | — | — | — | — | 0.18 | —    | [21]  |
| P11672 | P80188 | Neutrophil gelatinase-associated lipocalin              | — | — | — | — | — | 0.04 | —    | [130] |
| P01887 | P61769 | Beta-2-microglobulin                                    | — | — | — | — | — | —    | 3.07 | [131] |
| O09114 | P41222 | Prostaglandin-H2 D-isomerase                            | — | — | — | — | — | —    | 2.41 | [132] |
| Q9WUU7 | Q9UBR2 | Cathepsin Z                                             | — | — | — | — | — | —    | 2.32 | [133] |
| Q8BHC0 | Q9Y5Y7 | Lymphatic vessel endothelial hyaluronic acid receptor 1 | — | — | — | — | — | —    | 0.61 | —     |
| O70570 | P01833 | Polymeric immunoglobulin receptor                       | — | — | — | — | — | —    | 0.55 | —     |
| P26041 | P26038 | Moesin                                                  | — | — | — | — | — | —    | 0.53 | [134] |
| Q7TMJ8 | Q96FE7 | Phosphoinositide-3-kinase-interacting protein 1         | — | — | — | — | — | —    | 0.52 | [135] |
| P01660 | No     | Ig kappa chain V-III region PC 3741/TEPC 111            | — | — | — | — | — | —    | 0.43 | —     |
| Q60928 | P19440 | Glutathione hydrolase 1 proenzyme                       | — | — | — | — | — | —    | 0.39 | [104] |
| P61971 | P61970 | Nuclear transport factor 2                              | — | — | — | — | — | —    | 0.36 | —     |
| P06330 | No     | Ig heavy chain V region AC38 205.12                     | — | — | — | — | — | —    | 0.36 | —     |
| Q921W8 | Q8WVN6 | Secreted and transmembrane protein 1A                   | — | — | — | — | — | —    | 0.35 | —     |
| Q8BX43 | Q969Z4 | Tumour necrosis factor receptor superfamily member 19L  | — | — | — | — | — | —    | 0.33 | [81]  |
| Q9JM99 | Q92954 | Proteoglycan 4                                          | — | — | — | — | — | —    | 0.26 | [135] |

398

399

Table 2 Details of differential proteins between the experimental group and the control group at different time points.

400

401       Among the changes observed in the internal control of the experimental group, many studies  
402 have shown that carbamylated proteins are involved in the occurrence of diseases, especially  
403 atherosclerosis and chronic renal failure [136]. The kynurenine pathway is the primary pathway of  
404 tryptophan metabolism and plays an important role in early atherosclerosis [137]. The oxidation of  
405 proline can form glutamate semialdehyde, and glutamate semialdehyde is closely related to lipid  
406 peroxidation[138]. Elevated plasma homocysteine has also been widely studied as an independent  
407 risk factor for atherosclerosis [139]. Obstruction of the sulfur dioxide/aspartate aminotransferase  
408 pathway is also known to be involved in the pathogenesis of many cardiovascular diseases [140]. The  
409 Delta\_H(2)C(3) modification of lysine also refers to acrolein addition +38, and acrolein and other  
410  $\alpha$ - and  $\beta$ -unsaturated aldehydes are considered to be mediators of inflammation and vascular  
411 dysfunction [141]. CHDH modification of aspartic acid and NO\_SMX\_SIMD modification of  
412 cysteine have not been reported to be related to atherosclerosis and may act as potential modification  
413 sites.

414       Although it was not verified in a restricted search, there are also studies claiming that the  
415 interruption of cell signals mediated by electrophiles is related to the occurrence of atherosclerosis  
416 and cancer. HNE and ONE and their derivatives are both active lipid electrophile reagents that  
417 inhibit the release of proinflammatory factors to a certain extent [142]. N $\epsilon$ -carboxymethyl-lysine  
418 (CML) has been reported to accumulate in large amounts in the tissues of diabetes and  
419 atherosclerosis, and glucosone aldehyde is related to its formation [143]. Benzyl isothiocyanate salt  
420 has been reported to inhibit lipid production and fatty liver formation in obese mice fed a high-fat  
421 diet [144]. It has been reported in the literature that thiazolidine derivatives have a positive effect in  
422 the treatment of LDLR(-/-) atherosclerotic mice [145]. In addition, the carboxyethylation of lysine has  
423 also changed, and some literature indicates that the degree of carboxymethylation and  
424 carboxyethylation of lysine in the plasma of diabetic mice is significantly increased [146]. Changes  
425 in the expression of fucosylated oligosaccharides have been observed in pathological processes such  
426 as atherosclerosis [147]. In addition, the phosphorylation modification of tyrosine is related to the  
427 formation of esters, which may also be involved in lipid metabolism and the occurrence and  
428 progression of diseases.

429       In the differential modifications between the experimental group and the control group, some  
430 of the significantly changed modifications also changed in the internal control of the experimental  
431 group. In addition, the Delta\_H(2)C(2) modification at the N-terminus of the amino acid also refers  
432 to acetaldehyde +26. In addition, acetaldehyde stimulates the growth of vascular smooth muscle  
433 cells in a notch-dependent manner, promoting the occurrence of atherosclerosis [148]. Advanced  
434 protein glycosylation is an important mechanism for the development of advanced complications of  
435 diabetes, including atherosclerosis. Hydroimidazolone-1 derived from methylglyoxal is the most  
436 abundant advanced glycosylation end product in human plasma [149]. In addition, the guanidine  
437 modification of lysine may also be related to atherosclerosis.

438       Although did not been verified in the restricted search, an increasing number of studies have  
439 shown that short-chain fatty acids and their homologous acylation are involved in cardiovascular  
440 disease, and the proportions of 2-hydroxyisobutyrylation, malonylation and crotonylation in the  
441 experimental group were significantly increased [150]. N $\epsilon$ -carboxymethyl-lysine (CML) has been  
442 reported to accumulate in large amounts in the tissues in diabetes and atherosclerosis, and its induced  
443 PI3K/Akt signal inhibition promotes foam cell apoptosis and the progression of atherosclerosis [151].

444 In addition, glucosone is closely related to its formation, the proportion of which also increased  
445 significantly in the experimental group. Oxidation of tyrosine produces dihydroxyphenylalanine  
446 (DOPA), and the protein binding DOPA in tissues is elevated in many age-related pathological  
447 diseases, such as atherosclerosis and cataract formation <sup>[152]</sup>.

448

449 As mentioned above, the internal controls of the experimental group avoid the influence of  
450 genes, diet and other factors on the urinary proteome, but they may be affected by the growth and  
451 development of the organisms themselves. Intergroup control avoids the influence of development  
452 but cannot avoid factors such as diet. The identification results of chemical modifications of urine  
453 proteins showed that regardless of whether internal control or intergroup control was adopted, the  
454 modification status changed greatly and was closely related to lipids and cardiovascular diseases. In  
455 comparison, differences in the intergroup control may be more obvious.

## 456 **4 Conclusion**

457 This study explored changes in urinary proteomics of high-fat diet-fed *ApoE*<sup>-/-</sup> mice. The  
458 internal control results showed that even after only one week of a high-fat diet, when the urinary  
459 proteome of the control group was not significantly changed, the urinary proteome of the  
460 experimental group had changed significantly, and most of the enriched biological pathways were  
461 related to lipid metabolism and glycometabolism, indicating that the urinary proteome has the  
462 potential for early and sensitive monitoring of biological changes. Most of the proteins and their  
463 family members that change continually in disease progression have been reported to be related to  
464 cardiovascular diseases or can be used as biomarkers. The results of the intergroup comparison  
465 showed that the biological processes enriched by differential proteins at different time points  
466 correspond to the occurrence and development of the atherosclerosis, indicating that the urinary  
467 proteome has the potential to be used to monitor the disease process. The differential modification  
468 types in the internal control of the experimental group and the comparison between the experimental  
469 and control groups have also been reported to be related to lipids and cardiovascular diseases, which  
470 can be used as a reference for identifying new biomarkers.

471

## 472 **Declaration**

## 473 **Ethics approval and consent to participate**

474 All animal protocols governing the experiments in this study were approved by the Institute of Basic  
475 Medical Sciences Animal Ethics Committee, Peking Union Medical College (Approved ID: ACUC-  
476 A02-2014-007).

## 477 **Consent for publication**

478 Not applicable.

## 479 **Availability of data and material**

480 The mass spectrometry proteomics data have been deposited to the ProteomeXchange  
481 Consortium (<http://proteomecentral.proteomexchange.org>) via the iProX partner repository with  
482 the dataset identifier [PXD027610](https://proteomecentral.proteomexchange.org/dataset/PXD027610).

## 483 **Competing interests**

484 The authors declare that they have no known competing financial interests or personal relationships  
485 that could have appeared to influence the work reported in this paper.

## 486 **Funding**

487 This work was supported by the National Key Research and Development Program of China  
488 (2018YFC0910202 and 2016YFC1306300); the Fundamental Research Funds for the Central  
489 Universities (2020KJZX002); the Beijing Natural Science Foundation (7172076); the Beijing  
490 Cooperative Construction Project (110651103); the Beijing Normal University (11100704); and the  
491 Peking Union Medical College Hospital (2016-2.27).

## 492 **Authors' contributions**

493 **Hua Yuanrui** performed the experiments, analyzed the data, contributed reagents/materials/  
494 analysis tools, prepared figures and/or tables, authored or reviewed drafts of the paper,  
495 approved the final draft. **Meng Wenshu** and **Wei Jing** performed the experiments and  
496 contributed reagents/materials/analysis tools. **Liu Yongtao** analyzed the data and contributed  
497 reagents/materials/analysis tools. **Gao Youhe** conceived and designed the experiments,  
498 authored or reviewed drafts of the paper, approved the final draft.

## 499 **Acknowledgements**

500 Not applicable.



## References

1. Rahman, M.S. and K. Woollard, *Atherosclerosis*. Adv Exp Med Biol, 2017. **1003**: p. 121-144.
2. Tabas, I., G. Garcia-Cardena, and G.K. Owens, *Recent insights into the cellular biology of atherosclerosis*. J Cell Biol, 2015. **209**(1): p. 13-22.
3. *World Health Organization. Cardiovascular diseases (CVDs) Fact Sheet*. 2017.
4. Gao, Y., *Urine-an untapped goldmine for biomarker discovery?* Sci China Life Sci, 2013. **56**(12): p. 1145-6.
5. Ni, Y., et al., *Early candidate biomarkers found from urine of glioblastoma multiforme rat before changes in MRI*. Sci China Life Sci, 2018. **61**(8): p. 982-987.
6. Wei, J., W. Meng, and Y. Gao, *Urine proteome changes in rats subcutaneously inoculated with approximately ten tumor cells*. PeerJ, 2019. **7**: p. e7717.
7. Zhao, M., et al., *Dynamic changes of urinary proteins in a focal segmental glomerulosclerosis rat model*. Proteome Sci, 2014. **12**: p. 42.
8. Hatters, D.M., C.A. Peters-Libeu, and K.H. Weisgraber, *Apolipoprotein E structure: insights into function*. Trends Biochem Sci, 2006. **31**(8): p. 445-54.
9. Rosenfeld, M.E., et al., *Advanced atherosclerotic lesions in the innominate artery of the ApoE knockout mouse*. Arterioscler Thromb Vasc Biol, 2000. **20**(12): p. 2587-92.
10. Qu, G., et al., *The promotion effect of novel magnetic nanoparticles on atherosclerotic plaque vulnerability in apolipoprotein E(-/-) mice*. Toxicology, 2019. **419**: p. 24-31.
11. Wisniewski, J.R., et al., *Universal sample preparation method for proteome analysis*. Nat Methods, 2009. **6**(5): p. 359-62.
12. Bruderer, R., et al., *Extending the limits of quantitative proteome profiling with data-independent acquisition and application to acetaminophen-treated three-dimensional liver microtissues*. Mol Cell Proteomics, 2015. **14**(5): p. 1400-10.
13. Chi, H., et al., *Comprehensive identification of peptides in tandem mass spectra using an efficient open search engine*. Nat Biotechnol, 2018.
14. Armitage, E.G., et al., *Missing value imputation strategies for metabolomics data*. Electrophoresis, 2015. **36**(24): p. 3050-60.
15. Wang, S., et al., *NAGuideR: performing and prioritizing missing value imputations for consistent bottom-up proteomic analyses*. Nucleic Acids Res, 2020. **48**(14): p. e83.
16. Huang da, W., B.T. Sherman, and R.A. Lempicki, *Systematic and integrative analysis of large gene lists using DAVID bioinformatics resources*. Nat Protoc, 2009. **4**(1): p. 44-57.
17. Ma, J., et al., *iProX: an integrated proteome resource*. Nucleic Acids Res, 2019. **47**(D1): p. D1211-D1217.
18. Kwak, J., et al., *Are MUPs a Toxic Waste Disposal System?* PLoS One, 2016. **11**(3): p. e0151474.
19. De Giorgio, M.R., et al., *Trefoil factor family member 2 (Tff2) KO mice are protected from high-fat diet-induced obesity*. Obesity (Silver Spring), 2013. **21**(7): p. 1389-95.
20. Carroll, W.X., et al., *Angiotensinogen gene silencing reduces markers of lipid accumulation and inflammation in cultured adipocytes*. Front Endocrinol (Lausanne), 2013. **4**: p. 10.
21. von zur Muhlen, C., et al., *Urine proteome analysis reflects atherosclerotic disease in an*

- ApoE*<sup>-/-</sup> mouse model and allows the discovery of new candidate biomarkers in mouse and human atherosclerosis. *Mol Cell Proteomics*, 2012. **11**(7): p. M111 013847.
22. Liu, H., et al., *CCN4 regulates vascular smooth muscle cell migration and proliferation*. *Mol Cells*, 2013. **36**(2): p. 112-8.
23. Celik, S.F. and E. Celik, *Subclinical atherosclerosis and impaired cardiac autonomic control in pediatric patients with Vitamin B12 deficiency*. *Niger J Clin Pract*, 2018. **21**(8): p. 1012-1016.
24. K, M., et al., *Association of serum regenerating islet-derived protein 3-beta and oncostatin-M levels with the risk of acute coronary syndrome in patients with type 2 diabetes mellitus - A pilot study*. *Diabetes Metab Syndr*, 2020. **14**(5): p. 1087-1092.
25. Muendlein, A., et al., *Are AHSG polymorphisms directly associated with coronary atherosclerosis?* *Clin Chim Acta*, 2012. **413**(1-2): p. 287-90.
26. de la Cuesta, F., et al., *Deregulation of smooth muscle cell cytoskeleton within the human atherosclerotic coronary media layer*. *J Proteomics*, 2013. **82**: p. 155-65.
27. Ali, H., et al., *Localization and characterization of a novel secreted protein, SCUBE2, in the development and progression of atherosclerosis*. *Kobe J Med Sci*, 2013. **59**(4): p. E122-31.
28. Langlois, M.R. and J.R. Delanghe, *Biological and clinical significance of haptoglobin polymorphism in humans*. *Clin Chem*, 1996. **42**(10): p. 1589-600.
29. Wigren, M., et al., *Lack of Ability to Present Antigens on Major Histocompatibility Complex Class II Molecules Aggravates Atherosclerosis in ApoE*<sup>-/-</sup> Mice. *Circulation*, 2019. **139**(22): p. 2554-2566.
30. Dinarello, C.A., *Interleukin-18 and the pathogenesis of inflammatory diseases*. *Semin Nephrol*, 2007. **27**(1): p. 98-114.
31. Wu, G., et al., *LAMP-2 gene expression in peripheral leukocytes is increased in patients with coronary artery disease*. *Clin Cardiol*, 2011. **34**(4): p. 239-43.
32. Fujishima, Y., et al., *Adiponectin association with T-cadherin protects against neointima proliferation and atherosclerosis*. *FASEB J*, 2017. **31**(4): p. 1571-1583.
33. Stenman, S., K. von Smitten, and A. Vaheri, *Fibronectin and atherosclerosis*. *Acta Med Scand Suppl*, 1980. **642**: p. 165-70.
34. Ichiki, T., *Thyroid hormone and atherosclerosis*. *Vascul Pharmacol*, 2010. **52**(3-4): p. 151-6.
35. Kibel, A., T. Belovari, and I. Drenjancevic-Peric, *The role of transferrin in atherosclerosis*. *Med Hypotheses*, 2008. **70**(4): p. 793-7.
36. Wagsater, D., et al., *Serine protease inhibitor A3 in atherosclerosis and aneurysm disease*. *Int J Mol Med*, 2012. **30**(2): p. 288-94.
37. Sauro, M.D. and N.E. Zorn, *Prolactin induces proliferation of vascular smooth muscle cells through a protein kinase C-dependent mechanism*. *J Cell Physiol*, 1991. **148**(1): p. 133-8.
38. Hartman, J. and W.H. Frishman, *Inflammation and atherosclerosis: a review of the role of interleukin-6 in the development of atherosclerosis and the potential for targeted drug therapy*. *Cardiol Rev*, 2014. **22**(3): p. 147-51.
39. Tinajero, M.G. and A.I. Gotlieb, *Recent Developments in Vascular Adventitial Pathobiology: The Dynamic Adventitia as a Complex Regulator of Vascular Disease*. *Am J Pathol*, 2020. **190**(3): p. 520-534.
40. Natarelli, L. and A. Schober, *MicroRNAs and the response to injury in atherosclerosis*.

- Hamostaseologie, 2015. **35**(2): p. 142-50.
41. Wight, T.N., *The extracellular matrix and atherosclerosis*. Curr Opin Lipidol, 1995. **6**(5): p. 326-34.
  42. Fernandez-Murga, M.L., et al., *Impact of estrogens on atherosclerosis and bone in the apolipoprotein E-deficient mouse model*. Menopause, 2015. **22**(4): p. 428-36.
  43. Isenovic, E.R., et al., *Insulin, thrombin, ERK1/2 kinase and vascular smooth muscle cells proliferation*. Curr Pharm Des, 2010. **16**(35): p. 3895-902.
  44. Chi, Z. and A.J. Melendez, *Role of cell adhesion molecules and immune-cell migration in the initiation, onset and development of atherosclerosis*. Cell Adh Migr, 2007. **1**(4): p. 171-5.
  45. Whicher, J., L. Biasucci, and N. Rifai, *Inflammation, the acute phase response and atherosclerosis*. Clin Chem Lab Med, 1999. **37**(5): p. 495-503.
  46. van Dijk, R.A., et al., *Systematic Evaluation of the Cellular Innate Immune Response During the Process of Human Atherosclerosis*. J Am Heart Assoc, 2016. **5**(6).
  47. Tedgui, A. and Z. Mallat, *Cytokines in atherosclerosis: pathogenic and regulatory pathways*. Physiol Rev, 2006. **86**(2): p. 515-81.
  48. Garcia-Touchard, A., et al., *Extracellular proteases in atherosclerosis and restenosis*. Arterioscler Thromb Vasc Biol, 2005. **25**(6): p. 1119-27.
  49. Libby, P., et al., *Atherosclerosis*. Nat Rev Dis Primers, 2019. **5**(1): p. 56.
  50. Hansson, G.K., A.K. Robertson, and C. Soderberg-Naucler, *Inflammation and atherosclerosis*. Annu Rev Pathol, 2006. **1**: p. 297-329.
  51. Sueishi, K., et al., *Atherosclerosis: coagulation and fibrinolysis*. Semin Thromb Hemost, 1998. **24**(3): p. 255-60.
  52. Linton, M.F., J.J. Moslehi, and V.R. Babaev, *Akt Signaling in Macrophage Polarization, Survival, and Atherosclerosis*. Int J Mol Sci, 2019. **20**(11).
  53. Ustundag, S., et al., *Carotid intima media thickness is independently associated with urinary sodium excretion in patients with chronic kidney disease*. Ren Fail, 2015. **37**(8): p. 1285-92.
  54. Drapkina, O.M., B.B. Gegenava, and V.V. Fomin, *The role of the mLDL-induced activation of the complement system classical pathway and C3 expression stimulation in atherosclerosis*. Ter Arkh, 2018. **90**(4): p. 100-104.
  55. Jomova, K. and M. Valko, *Advances in metal-induced oxidative stress and human disease*. Toxicology, 2011. **283**(2-3): p. 65-87.
  56. Nathan, L. and G. Chaudhuri, *Estrogens and atherosclerosis*. Annu Rev Pharmacol Toxicol, 1997. **37**: p. 477-515.
  57. Wunderer, F., et al., *The role of hepcidin and iron homeostasis in atherosclerosis*. Pharmacol Res, 2020. **153**: p. 104664.
  58. Williams, J.W., et al., *B Cell-Mediated Antigen Presentation through MHC Class II Is Dispensable for Atherosclerosis Progression*. Immunohorizons, 2019. **3**(1): p. 37-44.
  59. Qiao, L., et al., *Deficient Chaperone-Mediated Autophagy Promotes Lipid Accumulation in Macrophage*. J Cardiovasc Transl Res, 2020.
  60. Sano, H., et al., *Human galectin-3 is a novel chemoattractant for monocytes and macrophages*. J Immunol, 2000. **165**(4): p. 2156-64.
  61. Paspaspyridonos, M., et al., *Galectin-3 is an amplifier of inflammation in atherosclerotic*

- plaque progression through macrophage activation and monocyte chemoattraction. Arterioscler Thromb Vasc Biol*, 2008. **28**(3): p. 433-40.
62. Sanchez, M.C., G.A. Chiabrando, and M.A. Vides, *Pregnancy zone protein-tissue-type plasminogen activator complexes bind to low-density lipoprotein receptor-related protein (LRP)*. *Arch Biochem Biophys*, 2001. **389**(2): p. 218-22.
63. Navarro, S., et al., *The endothelial cell protein C receptor: its role in thrombosis*. *Thromb Res*, 2011. **128**(5): p. 410-6.
64. Lin, M.S., et al., *Higher glutathione peroxidase expression in thoracic aorta as a protective factor against oxidative stress and atherosclerosis in rabbits*. *Cardiology*, 2007. **108**(4): p. 381-6.
65. Li, W., et al., *Cathepsin L is significantly associated with apoptosis and plaque destabilization in human atherosclerosis*. *Atherosclerosis*, 2009. **202**(1): p. 92-102.
66. Ohta, T., et al., *Soluble vascular cell-adhesion molecule-1 and soluble intercellular adhesion molecule-1 correlate with lipid and apolipoprotein risk factors for coronary artery disease in children*. *Eur J Pediatr*, 1999. **158**(7): p. 592-8.
67. Li, X., R.F. Li, and S.W. Ding, *[Effect of xinhe granule on vascular endothelial damage and endothelial expressed endothelin and intercellular adhesion molecule-1 in rats fed with high lipid diet]*. *Zhongguo Zhong Xi Yi Jie He Za Zhi*, 2001. **21**(8): p. 602-4.
68. Fortin, C.F., et al., *Aging and neutrophils: there is still much to do*. *Rejuvenation Res*, 2008. **11**(5): p. 873-82.
69. Li, Y.B., et al., *Oxidized low-density lipoprotein attenuated desmoglein 1 and desmocollin 2 expression via LOX-1/Ca(2+)/PKC-beta signal in human umbilical vein endothelial cells*. *Biochem Biophys Res Commun*, 2015. **468**(1-2): p. 380-6.
70. Jiang, K., et al., *Galectin-3 regulates desmoglein-2 and intestinal epithelial intercellular adhesion*. *J Biol Chem*, 2014. **289**(15): p. 10510-7.
71. Yanai, H., et al., *The possible contribution of a general glycosphingolipid transporter, GM2 activator protein, to atherosclerosis*. *J Atheroscler Thromb*, 2006. **13**(6): p. 281-5.
72. Ozkok, A., et al., *Low serum pancreatic enzyme levels predict mortality and are associated with malnutrition-inflammation-atherosclerosis syndrome in patients with chronic kidney disease*. *Int Urol Nephrol*, 2013. **45**(2): p. 477-84.
73. Kadowaki, T., et al., *Defective adipose tissue development associated with hepatomegaly in cathepsin E-deficient mice fed a high-fat diet*. *Biochem Biophys Res Commun*, 2014. **446**(1): p. 212-7.
74. Grolli, S., et al., *Odorant binding protein has the biochemical properties of a scavenger for 4-hydroxy-2-nonenal in mammalian nasal mucosa*. *FEBS J*, 2006. **273**(22): p. 5131-42.
75. Niccoli, G., et al., *Eosinophil cationic protein: A new biomarker of coronary atherosclerosis*. *Atherosclerosis*, 2010. **211**(2): p. 606-11.
76. Yang, C.S., et al., *Proteomic analysis of prognostic plasma biomarkers in peripheral arterial occlusive disease*. *Mol Biosyst*, 2017. **13**(7): p. 1297-1303.
77. Josefs, T., et al., *Neutrophil extracellular traps promote macrophage inflammation and impair atherosclerosis resolution in diabetic mice*. *JCI Insight*, 2020. **5**(7).
78. Posma, J.J., J.J. Posthuma, and H.M. Spronk, *Coagulation and non-coagulation effects of thrombin*. *J Thromb Haemost*, 2016. **14**(10): p. 1908-1916.
79. Shin, S.K., et al., *Long-term curcumin administration protects against atherosclerosis via*

- hepatic regulation of lipoprotein cholesterol metabolism*. Mol Nutr Food Res, 2011. **55**(12): p. 1829-40.
80. Krolikoski, M., J. Monslow, and E. Pure, *The CD44-HA axis and inflammation in atherosclerosis: A temporal perspective*. Matrix Biol, 2019. **78-79**: p. 201-218.
81. Smeets, E., S. Meiler, and E. Lutgens, *Lymphocytic tumor necrosis factor receptor superfamily co-stimulatory molecules in the pathogenesis of atherosclerosis*. Curr Opin Lipidol, 2013. **24**(6): p. 518-24.
82. van der Meer, J.H., T. van der Poll, and C. van 't Veer, *TAM receptors, Gas6, and protein S: roles in inflammation and hemostasis*. Blood, 2014. **123**(16): p. 2460-9.
83. Puerta, A., et al., *Study of the capillary electrophoresis profile of intact alpha-1-acid glycoprotein isoforms as a biomarker of atherothrombosis*. Analyst, 2011. **136**(4): p. 816-22.
84. Jiang, F., et al., *Angiotensin-converting enzyme 2 and angiotensin 1-7: novel therapeutic targets*. Nat Rev Cardiol, 2014. **11**(7): p. 413-26.
85. Wieland, T. and P.V. Attwood, *Alterations in reversible protein histidine phosphorylation as intracellular signals in cardiovascular disease*. Front Pharmacol, 2015. **6**: p. 173.
86. Chen, H., et al., *Inhibition of VDAC1 prevents Ca(2+)-mediated oxidative stress and apoptosis induced by 5-aminolevulinic acid mediated sonodynamic therapy in THP-1 macrophages*. Apoptosis, 2014. **19**(12): p. 1712-26.
87. Edfeldt, K., et al., *Involvement of the antimicrobial peptide LL-37 in human atherosclerosis*. Arterioscler Thromb Vasc Biol, 2006. **26**(7): p. 1551-7.
88. Wang, L., et al., *Inhibition of epidermal growth factor receptor attenuates atherosclerosis via decreasing inflammation and oxidative stress*. Sci Rep, 2017. **8**: p. 45917.
89. Zhao, C.F. and D.M. Herrington, *The function of cathepsins B, D, and X in atherosclerosis*. Am J Cardiovasc Dis, 2016. **6**(4): p. 163-170.
90. Biros, E., et al., *Upregulation of arylsulfatase B in carotid atherosclerosis is associated with symptoms of cerebral embolization*. Sci Rep, 2017. **7**(1): p. 4338.
91. Hernandez-Romero, D., et al., *CALU A29809G polymorphism in coronary atherothrombosis: Implications for coronary calcification and prognosis*. Ann Med, 2010. **42**(6): p. 439-46.
92. Asano, T., et al., *Physiological significance of resistin and resistin-like molecules in the inflammatory process and insulin resistance*. Curr Diabetes Rev, 2006. **2**(4): p. 449-54.
93. Haversen, L., et al., *Vimentin deficiency in macrophages induces increased oxidative stress and vascular inflammation but attenuates atherosclerosis in mice*. Sci Rep, 2018. **8**(1): p. 16973.
94. Oszajca, K., et al., *Association analysis of genetic polymorphisms of factor V, factor VII and fibrinogen beta chain genes with human abdominal aortic aneurysm*. Exp Ther Med, 2012. **4**(3): p. 514-518.
95. Li, Y.Q., et al., *Regulation of endothelial cell survival and death by the MAP kinase/ERK kinase kinase 3 - glyceraldehyde-3-phosphate dehydrogenase signaling axis*. Cell Signal, 2019. **58**: p. 20-33.
96. Fukai, T., et al., *Vascular expression of extracellular superoxide dismutase in atherosclerosis*. J Clin Invest, 1998. **101**(10): p. 2101-11.
97. Yu, X.H., et al., *NPC1, intracellular cholesterol trafficking and atherosclerosis*. Clin Chim



- Acta, 2014. **429**: p. 69–75.
98. Sun, J., Z. Wang, and X. Wang, *Suppression of LRRC19 promotes cutaneous wound healing in pressure ulcers in mice*. Organogenesis, 2018. **14**(1): p. 13–24.
99. Gouni-Berthold, I., W. Krone, and H.K. Berthold, *Vitamin D and cardiovascular disease*. Curr Vasc Pharmacol, 2009. **7**(3): p. 414–22.
100. Arenas de Larriva, A.P., et al., *Circulating ceruloplasmin, ceruloplasmin-associated genes and the incidence of venous thromboembolism in the Atherosclerosis Risk in Communities study*. J Thromb Haemost, 2019. **17**(5): p. 818–826.
101. Pollard, R.D., et al., *Procollagen C-endopeptidase Enhancer Protein 2 (PCPE2) Reduces Atherosclerosis in Mice by Enhancing Scavenger Receptor Class B1 (SR-BI)-mediated High-density Lipoprotein (HDL)-Cholesteryl Ester Uptake*. J Biol Chem, 2015. **290**(25): p. 15496–511.
102. Teunissen, P.F., et al., *MAB therapy against the IFN-alpha/beta receptor subunit 1 stimulates arteriogenesis in a murine hindlimb ischaemia model without enhancing atherosclerotic burden*. Cardiovasc Res, 2015. **107**(2): p. 255–66.
103. Bachhawat, A.K. and S. Yadav, *The glutathione cycle: Glutathione metabolism beyond the gamma-glutamyl cycle*. IUBMB Life, 2018. **70**(7): p. 585–592.
104. Presnell, C.E., et al., *Computational insights into the role of glutathione in oxidative stress*. Curr Neurovasc Res, 2013. **10**(2): p. 185–94.
105. Ichiki, T., et al., *Endothelial permeability in vitro and in vivo: protective actions of ANP and omapatrilat in experimental atherosclerosis*. Peptides, 2013. **48**: p. 21–6.
106. Inoue, M., et al., *Endothelial cell-selective adhesion molecule modulates atherosclerosis through plaque angiogenesis and monocyte-endothelial interaction*. Microvasc Res, 2010. **80**(2): p. 179–87.
107. Franca, K.C., et al., *Quiescin/sulfhydryl oxidase 1b (QSOX1b) induces migration and proliferation of vascular smooth muscle cells by distinct redox pathways*. Arch Biochem Biophys, 2020. **679**: p. 108220.
108. Bian, T., et al., *Human beta-Defensin 3 Reduces TNF-alpha-Induced Inflammation and Monocyte Adhesion in Human Umbilical Vein Endothelial Cells*. Mediators Inflamm, 2017. **2017**: p. 8529542.
109. Couchie, D., et al., *Human Plasma Thioredoxin-80 Increases With Age and in ApoE(-/-) Mice Induces Inflammation, Angiogenesis, and Atherosclerosis*. Circulation, 2017. **136**(5): p. 464–475.
110. Fu, X., et al., *7-Ketocholesterol inhibits isocitrate dehydrogenase 2 expression and impairs endothelial function via microRNA-144*. Free Radic Biol Med, 2014. **71**: p. 1–15.
111. Smith, J.D., *Apolipoprotein A-I and its mimetics for the treatment of atherosclerosis*. Curr Opin Investig Drugs, 2010. **11**(9): p. 989–96.
112. Hewing, B., et al., *Immunoproteasome subunit ss5i/LMP7-deficiency in atherosclerosis*. Sci Rep, 2017. **7**(1): p. 13342.
113. Zhang, Y., et al., *Association of the KLK1 rs5516 G allele and the ACE D allele with aortic aneurysm and atherosclerotic stenosis*. Medicine (Baltimore), 2016. **95**(44): p. e5120.
114. Lewis, R.D., et al., *The membrane attack complex of complement drives the progression of atherosclerosis in apolipoprotein E knockout mice*. Mol Immunol, 2010. **47**(5): p. 1098–105.

115. Karshovska, E., et al., *Hyperreactivity of junctional adhesion molecule A-deficient platelets accelerates atherosclerosis in hyperlipidemic mice*. *Circ Res*, 2015. **116**(4): p. 587-99.
116. Allawi, A.A.D., *Malnutrition, inflammation and atherosclerosis (MIA syndrome) in patients with end stage renal disease on maintenance hemodialysis (a single centre experience)*. *Diabetes Metab Syndr*, 2018. **12**(2): p. 91-97.
117. Segedy, A.K., et al., *Identification of small proline-rich repeat protein 3 as a novel atheroprotective factor that promotes adaptive Akt signaling in vascular smooth muscle cells*. *Arterioscler Thromb Vasc Biol*, 2014. **34**(12): p. 2527-36.
118. Burke, R.M., et al., *Small proline-rich protein 2B drives stress-dependent p53 degradation and fibroblast proliferation in heart failure*. *Proc Natl Acad Sci U S A*, 2018. **115**(15): p. E3436-E3445.
119. Madrigal-Matute, J., et al., *Thioredoxin-1/peroxiredoxin-1 as sensors of oxidative stress mediated by NADPH oxidase activity in atherosclerosis*. *Free Radic Biol Med*, 2015. **86**: p. 352-61.
120. Yuan, L., et al., *Carbonic Anhydrase 1-Mediated Calcification Is Associated With Atherosclerosis, and Methazolamide Alleviates Its Pathogenesis*. *Front Pharmacol*, 2019. **10**: p. 766.
121. Zhang, P., et al., *Impairing eukaryotic elongation factor 2 kinase activity decreases atherosclerotic plaque formation*. *Can J Cardiol*, 2014. **30**(12): p. 1684-8.
122. Habas, K. and L. Shang, *Alterations in intercellular adhesion molecule 1 (ICAM-1) and vascular cell adhesion molecule 1 (VCAM-1) in human endothelial cells*. *Tissue Cell*, 2018. **54**: p. 139-143.
123. Yu, H., et al., *Angiopoietin-2 attenuates angiotensin II-induced aortic aneurysm and atherosclerosis in apolipoprotein E-deficient mice*. *Sci Rep*, 2016. **6**: p. 35190.
124. Adada, M., C. Luberto, and D. Canals, *Inhibitors of the sphingomyelin cycle: Sphingomyelin synthases and sphingomyelinases*. *Chem Phys Lipids*, 2016. **197**: p. 45-59.
125. Kohno, T., et al., *Novel role of copper transport protein antioxidant-1 in neointimal formation after vascular injury*. *Arterioscler Thromb Vasc Biol*, 2013. **33**(4): p. 805-13.
126. Then, C., et al., *Serum uromodulin and risk for cardiovascular morbidity and mortality in the community-based KORA F4 study*. *Atherosclerosis*, 2020. **297**: p. 1-7.
127. Zhang, J., et al., *Altered expression of lysosomal hydrolase, acid alpha-glucosidase, gene in coronary artery disease*. *Coron Artery Dis*, 2016. **27**(2): p. 104-8.
128. Tawa, H., et al., *Role of afadin in vascular endothelial growth factor- and sphingosine 1-phosphate-induced angiogenesis*. *Circ Res*, 2010. **106**(11): p. 1731-42.
129. Kremen, M., et al., *Plasminogen mediates the atherogenic effects of macrophage-expressed urokinase and accelerates atherosclerosis in apoE-knockout mice*. *Proc Natl Acad Sci U S A*, 2008. **105**(44): p. 17109-14.
130. Hemdahl, A.L., et al., *Expression of neutrophil gelatinase-associated lipocalin in atherosclerosis and myocardial infarction*. *Arterioscler Thromb Vasc Biol*, 2006. **26**(1): p. 136-42.
131. Amighi, J., et al., *Beta 2 microglobulin and the risk for cardiovascular events in patients with asymptomatic carotid atherosclerosis*. *Stroke*, 2011. **42**(7): p. 1826-33.
132. Ragolia, L., et al., *Accelerated glucose intolerance, nephropathy, and atherosclerosis in prostaglandin D2 synthase knock-out mice*. *J Biol Chem*, 2005. **280**(33): p. 29946-55.



133. Sena, B.F., J.L. Figueiredo, and E. Aikawa, *Cathepsin S As an Inhibitor of Cardiovascular Inflammation and Calcification in Chronic Kidney Disease*. *Front Cardiovasc Med*, 2017. **4**: p. 88.
134. Baeyens, N., et al., *Redundant control of migration and adhesion by ERM proteins in vascular smooth muscle cells*. *Biochem Biophys Res Commun*, 2013. **441**(3): p. 579-85.
135. Nahon, J.E., M. Hoekstra, and M. Van Eck, *Total body proteoglycan 4 (Prg4) deficiency increases atherosclerosis susceptibility in apolipoprotein E knockout and low-density lipoprotein receptor knockout mice*. *Atherosclerosis*, 2018. **278**: p. 315-316.
136. Jaisson, S., C. Pietrement, and P. Gillery, *Carbamylation-derived products: bioactive compounds and potential biomarkers in chronic renal failure and atherosclerosis*. *Clin Chem*, 2011. **57**(11): p. 1499-505.
137. Wang, Q., et al., *Tryptophan-kynurenine pathway is dysregulated in inflammation, and immune activation*. *Front Biosci (Landmark Ed)*, 2015. **20**: p. 1116-43.
138. Pamplona, R., et al., *Proteins in human brain cortex are modified by oxidation, glycooxidation, and lipoxidation. Effects of Alzheimer disease and identification of lipoxidation targets*. *J Biol Chem*, 2005. **280**(22): p. 21522-30.
139. Nehler, M.R., L.M. Taylor, Jr., and J.M. Porter, *Homocysteinemia as a risk factor for atherosclerosis: a review*. *Cardiovasc Surg*, 1997. **5**(6): p. 559-67.
140. Chen, S.S., et al., *Sulfur dioxide acts as a novel endogenous gaseous signaling molecule in the cardiovascular system*. *Chin Med J (Engl)*, 2011. **124**(12): p. 1901-5.
141. Lee, S.E. and Y.S. Park, *Korean Red Ginseng water extract inhibits COX-2 expression by suppressing p38 in acrolein-treated human endothelial cells*. *J Ginseng Res*, 2014. **38**(1): p. 34-9.
142. McGrath, C.E., et al., *Structure-activity analysis of diffusible lipid electrophiles associated with phospholipid peroxidation: 4-hydroxynonenal and 4-oxononenal analogues*. *Chem Res Toxicol*, 2011. **24**(3): p. 357-70.
143. Nagai, R., et al., *Peroxynitrite induces formation of N(epsilon)-(carboxymethyl) lysine by the cleavage of Amadori product and generation of glucosone and glyoxal from glucose: novel pathways for protein modification by peroxynitrite*. *Diabetes*, 2002. **51**(9): p. 2833-9.
144. Chuang, W.T., et al., *Benzyl Isothiocyanate and Phenethyl Isothiocyanate Inhibit Adipogenesis and Hepatosteatosis in Mice with Obesity Induced by a High-Fat Diet*. *J Agric Food Chem*, 2019. **67**(25): p. 7136-7146.
145. Soares, E.S.A.K., et al., *Effect of new thiazolidine derivatives LPSF/GQ-02 and LPSF/GQ-16 on atherosclerotic lesions in LDL receptor-deficient mice (LDLR(-/-))*. *Cardiovasc Pathol*, 2013. **22**(1): p. 81-90.
146. Liu, A., et al., *Metformin Delays the Development of Atherosclerosis in Type 1 Diabetes Mellitus via the Methylglyoxal Pathway*. *Diabetes Ther*, 2020. **11**(3): p. 633-642.
147. Becker, D.J. and J.B. Lowe, *Fucose: biosynthesis and biological function in mammals*. *Glycobiology*, 2003. **13**(7): p. 41R-53R.
148. Hatch, E., et al., *Differential effects of alcohol and its metabolite acetaldehyde on vascular smooth muscle cell Notch signaling and growth*. *Am J Physiol Heart Circ Physiol*, 2018. **314**(1): p. H131-H137.
149. Heier, M., et al., *The advanced glycation end product methylglyoxal-derived*

- hydroimidazolone-1 and early signs of atherosclerosis in childhood diabetes*. Diab Vasc Dis Res, 2015. **12**(2): p. 139-45.
150. Chen, X.F., X. Chen, and X. Tang, *Short-chain fatty acid, acylation and cardiovascular diseases*. Clin Sci (Lond), 2020. **134**(6): p. 657-676.
151. Wang, Z., et al., *Nepsilon-carboxymethyl-lysine-induced PI3K/Akt signaling inhibition promotes foam cell apoptosis and atherosclerosis progression*. Biomed Pharmacother, 2019. **115**: p. 108880.
152. Rodgers, K.J. and R.T. Dean, *Metabolism of protein-bound DOPA in mammals*. Int J Biochem Cell Biol, 2000. **32**(9): p. 945-55.
